# Supplementary material
Source: ML conference proceedings conference paper supplement (https://openreview.net/forum?id=404TzkOCUD)
Supplement: supplementary_material [file attachment]

# WARP: WEIGHT TELEPORTATION FOR ATTACK-RESILIENT UNLEARNING PROTOCOLS

**Anonymous authors**

Paper under double-blind review

## ABSTRACT

Approximate machine unlearning aims to efficiently remove the influence of specific data points from a trained model, offering a practical alternative to full retraining. However, it introduces privacy risks: an adversary with access to pre- and post-unlearning models can exploit their differences for membership inference or data reconstruction. We show these vulnerabilities arise from two factors: large gradient norms of *forget-set* samples and the close proximity of unlearned parameters to the original model. To demonstrate their severity, we propose unlearning-specific membership inference and reconstruction attacks, showing that several state-of-the-art methods (e.g., NGP, SCRUB) remain vulnerable. To mitigate this leakage, we introduce WARP, a *plug-and-play teleportation defense* that leverages neural network symmetries to reduce *forget-set* gradient energy and increase parameter dispersion while preserving predictions. This reparameterization obfuscates the signal of forgotten data, making it harder for attackers to distinguish forgotten samples from non-members or recover them via reconstruction. Across six unlearning algorithms, our approach achieves consistent privacy gains, reducing adversarial advantage (AUC) by up to 64% in black-box and 92% in white-box settings, while maintaining accuracy on retained data. These results highlight teleportation as a general tool for reducing attack success in approximate unlearning.

## 1 INTRODUCTION

Machine unlearning (MU) aims to enforce the “right to be forgotten” by updating a trained model so that a designated *forget-set* has no influence Bourtole et al. (2021); Zhao et al. (2024). The ideal outcome matches retraining from scratch on the remaining *retain-set*, with both the model’s parameters and predictions unaffected by the forgotten data, and without degrading generalization. A primary motivation for machine unlearning is to ensure privacy compliance for sensitive information Wang et al. (2025a). Once personal data is used for training, models may memorize specific details Ravikumar et al. (2024a), creating risks of privacy breaches Bourtole et al. (2021); Carlini et al. (2022b). Unlearning addresses this by eliminating such traces, preventing exposure. The most direct solution is retraining from scratch without the *forget set*, but this is computationally prohibitive. *Exact Unlearning* methods such as SISA Bourtole et al. (2021) reduce cost by modifying training to allow provable deletion, but they require proactive deployment and add overhead. To avoid full retraining, *Approximate Unlearning* methods finetune the original model to forget the target data while preserving utility Kurmanji et al. (2023); Chundawat et al. (2023a); Golatkar et al. (2020); Thudi et al. (2022), trading computational efficiency against formal guarantees.

At the same time, ML models are vulnerable to privacy attacks Rigaki & Garcia (2023). In Membership Inference Attacks (MIA), an adversary determines whether a given sample was part of the training set Shokri et al. (2017). In Data Reconstruction Attacks (DRA), the adversary seeks to recover raw data (or a close approximation) from model outputs or parameters Yin et al. (2021); Li et al. (2022); Jeon et al. (2021); Fang et al. (2023). These attacks have been demonstrated in both black-box (access to outputs) and white-box (access to weights) settings Nasr et al. (2019).

Ironically, MU itself can leak the very data it aims to erase. Given access to both the original and unlearned models, an adversary can mount differencing attacks Hu et al. (2024); Bertran et al. (2024), which substantially improve reconstruction success. Even models previously resistant to MIAs can become vulnerable once deletion is performed Bertran et al. (2024); Chen et al. (2021). The key

054 observation is that the parameter difference between the two models approximates the gradient of  
 055 the forgotten sample (up to second-order terms), effectively releasing it to the adversary. Gradient  
 056 inversion techniques, as in federated learning Geiping et al. (2020), can then reconstruct the forgotten  
 057 data. Thus, approximate unlearning methods, especially gradient-ascent variants Kurmanji et al.  
 058 (2023), can inadvertently compromise privacy instead of ensuring it.

059 In this work, we aim to strengthen MU against pri-  
 060 vacy attacks by characterizing two key factors driving  
 061 leakage. The first, illustrated in Figure 1, is that a  
 062 forgotten sample’s privacy risk correlates with its  
 063 gradient norm in the original model. Intuitively, sam-  
 064 ples with large gradient magnitudes during training or  
 065 finetuning induce stronger parameter changes when  
 066 removed, making them more detectable via MIA and  
 067 more exploitable for reconstruction Ye et al. (2023).

068 Second, as shown in prior work Thudi et al. (2022);  
 069 Kurmanji et al. (2023), most approximate unlearn-  
 070 ing methods make minor parameter updates, typi-  
 071 cally by maximizing the *forget-set* loss while keep-  
 072 ing retain-set accuracy stable. This keeps the un-  
 073 learned model close to the original, so the parameter  
 074 difference encodes information about the forgotten  
 075 data. In gradient-ascent-based methods Kurmanji  
 076 et al. (2023); Chundawat et al. (2023a), this difference is essentially the *forget-set* gradient. Recent  
 077 studies confirm that such updates expose information equivalent to a single gradient step on the  
 078 forgotten sample Bertran et al. (2024), which attackers can invert to reconstruct it.

079 To mitigate these risks, we propose WARP, a plug-and-play defense that integrates into existing  
 080 unlearning algorithms without training-time statistics. Our method leverages neural network telepor-  
 081 tation Armenta et al. (2023), exploiting parameter-space symmetries (e.g., rescaling or permutation)  
 082 that preserve predictions. By applying selective teleportation steps before or during unlearning,  
 083 we reduce *forget-set* gradient norms while injecting symmetry-preserving randomness. This yields  
 084 unlearned models that retain accuracy yet are displaced in parameter space, making it harder for  
 085 an attacker to disentangle forgetting from teleportation. Consequently, membership inference and  
 086 reconstruction attacks are significantly weakened, as shown in Sections 4.2, 4.3, and 4.4.

087 Our **contributions** are summarized as follows:

- 088
- 089 • **Tailored privacy attacks.** We design MIA and DRA for the unlearning setting, where the  
 090 adversary compares pre- and post-unlearning models. These attacks show that leading methods  
 091 remain vulnerable, as parameter updates still expose information about the *forget-set*.  
 092
- 093 • **Symmetry-based defense.** We propose WARP, a plug-and-play defense that, [building on existing](#)  
 094 [teleportation and symmetry constructions](#), applies loss-preserving transformations to reduce *forget-*  
 095 *set* gradient norms and increase parameter dispersion, thereby obscuring the signal exploited in  
 096 reconstruction and inference. ~~It~~, [while remaining agnostic to the particular symmetry mechanism](#)  
 097 [used to realize these transformations](#). WARP integrates into gradient-based post-hoc unlearning  
 098 algorithms without requiring training-time statistics.  
 099
- 100 • **Comprehensive evaluation.** We evaluate our attacks and defense across three datasets—CIFAR-10,  
 101 Tiny-ImageNet, and ImageNet-1K—using ResNet-18 and ViT-B/16 models under both black-box  
 102 and white-box settings. Results across multiple unlearning algorithms show that teleportation  
 103 consistently reduces privacy leakage while preserving accuracy on the retain set.  
 104

105 Overall, our work reframes unlearning privacy risk through the lens of *gradient norm reduction*  
 106 and connects it to neural network symmetry, an underexplored optimization principle that lays a  
 107 conceptual foundation for more privacy attack-resilient unlearning algorithms. Related works to ours  
 are discussed in more detail in Appendix A. The code is available at [this link](#).

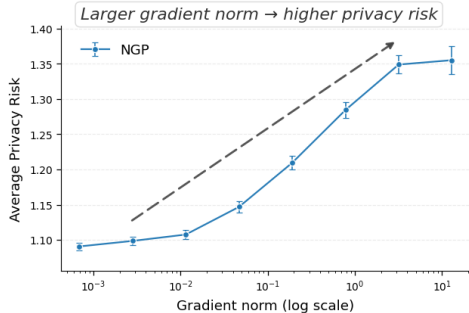

Figure 1: Privacy risk vs. gradient norms of *forget-set* samples, measured with U-LiRA.

## 2 THREAT MODEL

We consider a strong adversary performing *sample-wise membership inference*, distinguishing whether a sample belongs to the *forget-set*  $\mathcal{D}_f$  or the *test set*  $\mathcal{D}_{\text{test}}$ . The attacker has access to both the pre- and post-unlearning models.

**Attacker Capabilities.** The attacker has full access to both the original  $\theta^{\text{org}}$  and unlearned model  $\theta^u$ , as well as complete knowledge of the unlearning algorithm  $\mathcal{A}_{\text{unlearn}}$  and its hyperparameters  $\mathcal{H}_{\text{unlearn}}$  (e.g., optimizer, learning rate, update steps, retain-set size).

We consider two settings: **Black-box** — the attacker queries outputs  $f(x; \theta^u)$ . **White-box** — the attacker additionally accesses full internals of both models  $(\theta^{\text{org}}, \theta^u)$ , including weights.

**Attack Objective** Given a sample  $(x, y)$  from either the *forget-set*  $\mathcal{D}_{\text{forg}}$  or the held-out test set  $\mathcal{D}_{\text{test}}$ , the attacker computes a score  $A'(x, y)$  and predicts membership as  $A(x, y) = \mathbb{I}[A'(x, y) > \tau]$ , where  $\mathbb{I}[\cdot]$  is the indicator function and  $\tau$  is a decision threshold. The attacker seeks a high true positive rate (TPR) on forgotten samples while maintaining a low false positive rate (FPR) on test samples. This directly measures privacy risk: if membership can be reliably inferred, incomplete unlearning is exposed and the forgotten samples identified. Unlike prior work, our goal is to audit unlearning algorithms from a *privacy perspective*, rather than evaluating indistinguishability between approximate and exact unlearning outcomes.

## 3 METHODOLOGY

### 3.1 PRIVACY ATTACKS

To systematically evaluate privacy leakage in unlearning, we consider two complementary classes of attacks: *membership inference* and *data reconstruction*.

**Black-box (U-LiRA).** For the black-box setting, we adopt U-LiRA (Hayes et al., 2025), an adaptation of LiRA (Carlini et al., 2022a) to unlearning. U-LiRA leverages shadow models trained and unlearned with the same algorithm as the target, yielding a strong adaptive baseline for auditing privacy. We defer full algorithmic details to Appendix B.

**White-box (Gaussian Gradient–Difference).** In the white-box setting, we extend the Gaussian gradient–difference framework of Leemann et al. (2023) to the unlearning case by contrasting gradients computed on both the original and unlearned models. This contrast provides a powerful signal of residual membership leakage when both model versions are available to attacker. The detailed proposed formulation and test statistic are presented in Appendix C.

**Reconstruction Attack in Unlearning.** We develop a *white-box* reconstruction attack tailored to approximate unlearning with retain-set updates. Let  $\Delta\theta = \theta^u - \theta^{\text{org}}$  be the observed parameter change after one unlearning stage (possibly aggregating multiple optimizer steps). As in gradient inversion, we seek an input whose parameter-gradient aligns with a target vector; here the natural target is  $\Delta\theta$ . Our baseline (single-sample) objective is:

$$\hat{x}, \hat{y} \in \arg \min_{x, y} \mathcal{D}(\nabla_{\theta} \ell(f(x; \theta^{\text{org}}), y), \Delta\theta), \quad (1)$$

where  $\ell$  is the training loss,  $f(\cdot; \theta)$  the network, and  $\mathcal{D}$  a distance (e.g.,  $\ell_2$  or negative cosine).

With approximate unlearning, the update  $\Delta\theta$  mixes retain and forget gradients. For a forget example  $(x_f, y_f)$  and a retain minibatch  $\mathcal{B}_r$ ,

$$\Delta\theta \approx -\eta \left( g_r - \alpha g_f \right), \quad g_r = \frac{1}{|\mathcal{B}_r|} \sum_{(x_r, y_r) \in \mathcal{B}_r} \nabla_{\theta} \ell(f(x_r; \theta^{\text{org}}), y_r), \quad g_f = \nabla_{\theta} \ell(f(x_f; \theta^{\text{org}}), y_f), \quad (2)$$

with effective step size  $\eta$  and ascent weight  $\alpha > 0$ . Directly targeting  $\Delta\theta$  in equation 1 is therefore confounded by  $g_r$ . Even when equation 1 is instantiated with state-of-the-art gradient inversion

162 methods, naively inverting the unfiltered update  $\Delta\theta$  remains ineffective, producing low accuracy of  
 163 the reconstruction (see Section 4, Table 2).

164 Let  $G_{\text{org}} = [g(b_i; \theta^{\text{org}})]_{i=1}^m$  and  $G_u = [g(b_i; \theta^u)]_{i=1}^m$  be gradient snapshots on a small probe set drawn  
 165 from the training distribution. We compute thin SVDs,  $G_{\text{org}} = U_{\text{org}} \Sigma_{\text{org}} V_{\text{org}}^\top$  and  $G_u = U_u \Sigma_u V_u^\top$ ,  
 166 and keep the top- $k$  left singular vectors to obtain orthonormal bases (columns) for the dominant  
 167 gradient subspaces. Define the *orthogonal projectors*

$$168 \Pi_{\text{org}} = U_{\text{org}} U_{\text{org}}^\top, \quad \Pi_u = U_u U_u^\top, \quad \Pi_u^\perp = I - \Pi_u.$$

169 Unlearning attenuates the forget component, so retain gradients are expected to persist in both models,  
 170 whereas the forget component is prominent in  $\theta^{\text{org}}$  but suppressed in  $\theta^u$ . We therefore *orthogonalize*  
 171 the update against the unlearned subspace and keep only directions supported by the original model:

$$172 \tilde{g}_f = \Pi_{\text{org}} \Pi_u^\perp \left( -\frac{1}{\eta} \Delta\theta \right). \quad (3)$$

173 Intuitively,  $\Pi_u^\perp$  removes directions consistent with retain gradients that remain after unlearning, while  
 174  $\Pi_{\text{org}}$  preserves directions active before unlearning where the forget signal resides. If the retain  
 175 subspace is well captured, then  $\Pi_u^\perp g_r \approx 0$  and  $\Pi_{\text{org}} \Pi_u^\perp (\alpha g_f) \approx \alpha g_f$ , yielding a high-SNR estimate of  
 176 the forget gradient.

177 We reconstruct the forgotten sample by solving the filtered inversion:

$$178 \hat{x}_f, \hat{y}_f \in \arg \min_{x,y} \mathcal{D}(\nabla_{\theta} \ell(f(x; \theta^{\text{org}}), y), \tilde{g}_f), \quad (4)$$

179 with optional priors or constraints on  $(x, y)$ . In practice, we choose  $k$  to retain a fixed fraction  
 180 of gradient energy (e.g., 90–95%), which stabilizes the projectors and reliably isolates the forget  
 181 component via orthogonalization. We empirically validate that orthogonal subspace filtering boosts  
 182 reconstruction success across models and datasets; see Section 4.4 and Appendix Table 3.

### 183 3.2 WARP (TELEPORTATION-BASED DEFENSE)

184 **Motivation I: Parameter closeness increases privacy leakage.** We formulate post-hoc unlearning  
 185 as minimizing a composite objective that balances forgetting on  $\mathcal{D}_f$  with utility on  $\mathcal{D}_r$ :

$$186 \min_{\theta} \underbrace{\ell_f(\theta | \mathcal{D}_f)}_{\text{Forget}} + \lambda \underbrace{\ell_r(\theta | \mathcal{D}_r)}_{\text{Retain}}, \quad \lambda \geq 0, \quad (5)$$

187 where  $\theta$  denotes model parameters;  $\ell_f$  is any differentiable *forgetting surrogate* that penalizes high  
 188 confidence or reduces fidelity on  $\mathcal{D}_f$  (e.g., loss-inflation, uniform/soft labels, margin expansion); and  
 189  $\ell_r$  is the standard training/consistency loss on  $\mathcal{D}_r$  to preserve performance. The trade-off coefficient  $\lambda$   
 190 controls how strongly the unlearning step remains anchored to the retain-set: larger  $\lambda$  keeps  $\theta^u$  closer  
 191 to  $\theta^{\text{org}}$ , preserving accuracy but reducing the parameter shift introduced by forgetting. A first-order  
 192 optimizer with mini-batches  $\mathcal{B}_f \subset \mathcal{D}_f$  and  $\mathcal{B}_r \subset \mathcal{D}_r$  yields the iterative update

$$193 \theta_{t+1} = \theta_t - \eta_t \left( \nabla_{\theta} \ell_f(\theta_t | \mathcal{B}_f) + \lambda \nabla_{\theta} \ell_r(\theta_t | \mathcal{B}_r) \right), \quad (6)$$

194 which encompasses common post-training approximate unlearning schemes; for instance, “negative-  
 195 gradient” methods are recovered by taking  $\ell_f(\cdot) = -\ell_{\text{train}}(\cdot)$  (i.e., ascent on the standard training  
 196 loss over  $\mathcal{D}_f$ ), whereas rehearsal/consistency-based approaches instantiate  $\ell_r$  with supervised loss or  
 197 distillation on  $\mathcal{D}_r$  Thudi et al. (2022); Kurmanji et al. (2023); Chundawat et al. (2023a).

198 Because equation 5 explicitly regularizes utility on  $\mathcal{D}_r$  and is optimized with small steps and early  
 199 stopping on  $\mathcal{D}_f$ , the resulting unlearned parameters  $\theta^u$  typically remain *close* to the original  $\theta^{\text{org}}$   
 200 in parameter space. The displacement  $\Delta\theta = \theta^u - \theta^{\text{org}}$  is well-approximated (to first order) by a  
 201 weighted combination of gradients on the *forget-set*, mildly contaminated by retain gradients Thudi  
 202 et al. (2022); Kurmanji et al. (2023); Huang et al. (2024). This proximity creates a privacy attack  
 203 surface: An adversary with access to  $(\theta^{\text{org}}, \theta^u)$  can leverage  $\Delta\theta$  to perform membership inference or  
 204 gradient-based reconstruction of  $\mathcal{D}_f$  Hu et al. (2024); Bertran et al. (2024), motivating the defenses  
 205 applied over unlearning algorithms.

**Motivation II: Gradient norm and curvature amplify leakage.** Recent evidence suggests that the per-sample gradient trajectory is a strong predictor of privacy vulnerability. Tobaben et al. (2024) show that training examples that accumulate larger gradient norms during optimization are significantly more prone to MIA, reflecting the intuition from differential privacy that each update’s privacy loss scales with gradient magnitude. Complementing this, Ravikumar et al. (2024b) demonstrate that curvature around training samples—captured via local sharpness of the loss—serves as a reliable discriminator between members and non-members, with sharper regions implying higher membership exposure. These findings aligns with theoretical analyses such as Ye et al. (2023), who prove that large per-sample gradients at initialization inflate the KL divergence between neighboring training trajectories, directly increasing the sample’s privacy risk. Motivated by this, we hypothesize that approximate unlearning inherits the same vulnerability: samples with higher gradient norms tend to push parameters towards sharper local extrema during both training and unlearning, thereby overshooting the target update and leaving a stronger privacy footprint. Our experiments (Fig.1) confirm this intuition, revealing a clear correlation between a sample’s gradient norm in the original model and its susceptibility to membership inference after unlearning.

To simultaneously address (i) the parameter–space proximity that enables differencing and (ii) the gradient–norm driver of leakage, we leverage *loss-invariant symmetries* of deep networks.

**Symmetry framework.** Let  $\mathcal{G}$  denote a set of symmetry transformations acting on parameters  $\theta$  (and, when needed, internal representations) such that the task loss is invariant:  $\mathcal{L}(X, \theta) = \mathcal{L}(g(X, \theta))$  for all  $g \in \mathcal{G}$  Zhao et al. (2022; 2023); Armenta et al. (2023); Simsek et al. (2021). A *teleportation* step chooses  $g$  and updates  $\theta \leftarrow g \cdot \theta$ , moving within the loss level set. In our defense, we select  $g$  to reduce the gradient norm of the *forget-set* while preserving utility on the retain-set:

$$g^* \in \arg \min_{g \in \mathcal{G}} \left\{ \underbrace{\sum_{(x,y) \in \mathcal{D}_f} \|\nabla_{\theta} \ell(f(x; g \cdot \theta), y)\|_2^2}_{\text{shrink forget-set gradients}} - \beta \underbrace{\|g \cdot \theta - \theta\|_2^2}_{\text{increase parameter dispersion}} \right\} \quad (7)$$

s.t.  $\ell_r(g \cdot \theta | \mathcal{D}_r) \leq \ell_r(\theta | \mathcal{D}_r) + \varepsilon.$

with trade-off  $\beta \geq 0$  and tolerance  $\varepsilon \geq 0$ . The first term reduces squared gradient norms of forget examples (Motivation II); the dispersion term adds symmetry-preserving randomness, displacing parameters from  $\theta^{\text{org}}$  (Motivation I); the constraint preserves retain performance.

WARP operates on an abstract prediction-preserving symmetry map  $T_{\phi}$ , and any such symmetry family can instantiate the framework. In practice, we use two concrete realizations—the retain–null-space projection introduced in the next paragraph, and the change-of-basis teleportation detailed in Appendix D—to illustrate this generality. To complement this algorithmic view, Appendix O develops teleportation-aware information-theoretic bounds on gradient-based reconstruction, showing how injecting symmetry-induced noise via  $T_{\phi}$  expands the symmetry orbit and provably increases the expected reconstruction error for attackers observing  $(\theta^{\text{org}}, \theta^u)$ .

**Primary instantiation: teleportation with retain null-space projection.** We first describe one convenient way to instantiate  $T_{\phi}$  using retain–null-space projections Wu et al. (2025). To optimize equation 7 efficiently on modern architectures without explicit group actions, we adopt *teleportation with input null-space gradient projection* Wu et al. (2025) and instantiate it using the recent projector formulation that keeps updates on the loss-invariant level set by per-layer projections onto the input null space (thus leaving the task loss unchanged up to numerical error). Concretely, define the *teleportation loss*

$$\mathcal{L}_{\text{tel}}(\theta) = \sum_{(x,y) \in \mathcal{B}_f} \|\nabla_{\theta} \ell(f(x; \theta), y)\|_2^2 - \beta \|\theta - \theta^{\text{org}}\|_2^2,$$

where  $\mathcal{B}_f$  is a minibatch from  $\mathcal{D}_f$ . Let  $R_{\ell}$  be the per-layer representation matrix from a *retain* minibatch (layer- $\ell$  inputs), with thin SVD  $R_{\ell} = U_{\ell} \Sigma_{\ell} V_{\ell}^{\top}$ . We keep the top- $k$  left singular vectors  $B_{\ell} = U_{\ell,1:k}$  to span the retain subspace and define the orthogonal projector onto its complement  $\Pi_{\ell}^{\perp} = I - B_{\ell} B_{\ell}^{\top}$ . A teleportation step then applies the layer-wise update

$$W_{\ell}^{t+1} \leftarrow W_{\ell}^t - \eta_{\text{tel}} \Pi_{\ell}^{\perp} (\nabla_{W_{\ell}} \mathcal{L}_{\text{tel}}(\theta^t)) \quad (8)$$

which (i) *reduces* the forget-set gradient norms by descending on  $\mathcal{L}_{\text{tel}}$ , (ii) *preserves* the function on the retain-set by restricting motion to the retain-orthogonal subspace. The projection operator in equation 8 corresponds to the input-null-space projector. This is implemented by subtracting the component in the subspace of the core gradient, leaving only the residual for the teleport step.

To align the invariance with utility preservation, we compute  $B_\ell$  *only from retain data*: ~~if  $R_\ell(\mathcal{D}_r) = [\phi_\ell(x)]_{x \in \mathcal{B}_r}$ , stacks~~. Let  $R_\ell(\mathcal{D}_r) = [\phi_\ell(x)]_{x \in \mathcal{B}_r}$  denote the matrix formed by stacking the layer- $\ell$  inputs for a retain minibatch  $\mathcal{B}_r$ , then

$$R_\ell(\mathcal{D}_r) = U_\ell \Sigma_\ell V_\ell^\top, \quad B_\ell = U_{\ell,1:k}, \quad \Pi_\ell^\perp = I - B_\ell B_\ell^\top,$$

Then:

$$R_\ell(\mathcal{D}_r) = U_\ell \Sigma_\ell V_\ell^\top, \quad B_\ell = U_{\ell,1:k}, \quad \Pi_\ell^\perp = I - B_\ell B_\ell^\top. \tag{9}$$

We set  $k$  to capture a fixed fraction of retain variance (typically ~~90%–95%~~95%–99%) and apply the resulting projectors in equation 8. This confines each teleport step to the retain-orthogonal subspace, stabilizing predictions on  $\mathcal{D}_r$  while suppressing gradient energy on  $\mathcal{D}_f$ . Since  $\Pi_\ell^\perp$  removes directions spanned by retain representations, suitable choices of rank  $k$  and step size  $\eta_{\text{tel}}$  ensure that

$$|\ell_r(g \cdot \theta | \mathcal{D}_r) - \ell_r(\theta | \mathcal{D}_r)| \leq \varepsilon,$$

which matches the constraint below equation 7; ~~empirically, the in practice~~, prediction drift on  $\mathcal{D}_r$  ~~is remains~~ within numerical tolerance. ~~An alternative instantiation of symmetry is detailed in (see Appendix P for hyperparameter sensitivity). To underline that WARP is not tied to retain-null-space projections, Appendix D instantiates  $T_\phi$  using the SVD-free change-of-basis symmetries introduced in Armenta et al. (2023).~~

**Plug-and-play scope.** Teleportation is interleaved with the standard unlearning update equation 6, requiring no training-time per-sample gradients or stored statistics. The update equation 8 is applied at intervals  $t \in K \subset 0, \dots, T-1$  (e.g., every  $S$  steps), keeping *forget-set* gradient norms low while preserving retention performance. The full algorithm appears in Appendix K.

## 4 EXPERIMENTS

We now empirically evaluate the proposed teleportation-based defense across multiple unlearning algorithms, datasets, and model architectures. Our experiments are designed to answer the following research questions: (i) How vulnerable are state-of-the-art unlearning algorithms to privacy attacks under both black-box and white-box threat models? (ii) To what extent does teleportation reduce membership and reconstruction leakage without sacrificing utility on the retain-set?

**Experimental Setup.** We conduct experiments on CIFAR-10, Tiny-ImageNet, and ImageNet-1K. On CIFAR-10 we use ResNet-18, while on ImageNet we evaluate ViT-B/16, covering both convolutional and transformer models. All models are trained with SGD and standard augmentation. Following prior work Kurmanji et al. (2023); Chundawat et al. (2023a), forget sets  $\mathcal{D}_f$  are sampled as roughly 1% of training data per class, with retain sets  $\mathcal{D}_r$  comprising the rest.

**Baselines.** We benchmark six representative unlearning algorithms—NEGGRAD+ Kurmanji et al. (2023), SCRUB Kurmanji et al. (2023), SALUN Fan et al. (2023), PGU Hoang et al. (2024), BADTEACHER Chundawat et al. (2023a), and SRF-ON Huang et al. (2024)—covering paradigms of gradient ascent, regularization, saliency, projection, and distillation. Full details are in Appendix E.

### 4.1 OVERVIEW EFFECTIVENESS OF WARP

Figure 2 summarizes privacy and utility across six unlearning methods with and without our plug-in defense. Each radar chart reports black-box membership inference risk (AUC and TPR at low FPR), accuracy on the most-memorized subset, white-box membership inference risk (AUC and TPR at low FPR), and standard test accuracy. The most-memorized subset is selected following our U-LIRA

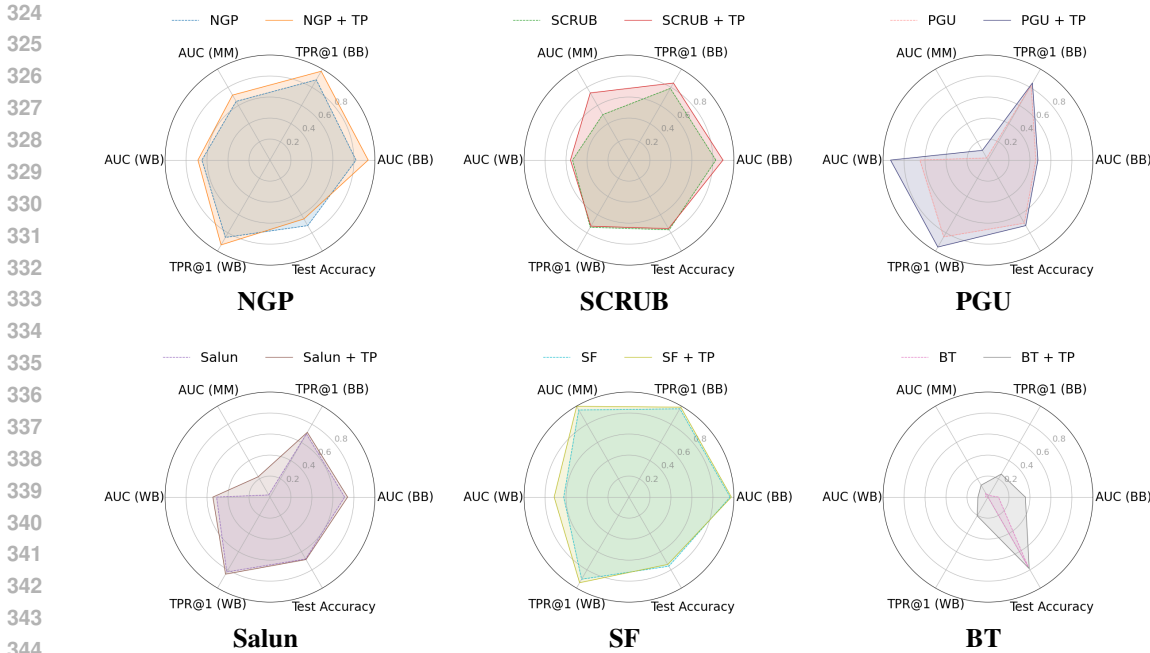

Figure 2: Comparison of unlearning vs. teleportation across six unlearning methods.

protocol in Sec. 4.2, motivated by prior findings that highly memorized samples carry elevated unlearning risk Naderloui et al. (2025). For visualization, all metrics are min–max normalized across methods. Privacy metrics in which lower is better are inverted by plotting  $1 - \text{metric}$ , so that larger polygons correspond to stronger privacy, while higher test accuracy remains preferable.

Three key observations emerge. First, no unlearning algorithm dominates across all axes. For instance, SF performs well under black-box auditing but is weaker under white-box auditing and in test accuracy, illustrating the necessity of evaluating under both threat models. Second, algorithms that appear robust under black-box evaluation such as NGP and SF still exhibit substantial leakage under our white-box test, underscoring the importance of auditing with gradient- or weight-based evidence. Third, adding our symmetry-based teleportation module, instantiated via retain null-space projection, consistently improves privacy across both black-box and white-box metrics while maintaining utility. In some cases, such as BT and SF, teleportation even improves test accuracy. The only noticeable accuracy drop occurs for NGP (about one percentage point), for which we provide a detailed privacy–utility trade-off analysis in Appendix I. The runtime overhead of teleportation is analyzed separately in Appendix J, and Appendix P presents ablations showing that WARP’s performance does not hinge on fragile choices of teleportation hyperparameters. Overall, these results demonstrate that the proposed defense empirically reduces attack success consistently and effectively across a diverse set of unlearning algorithms and threat models. For completeness, we also compare WARP against the strongest noise-based alternative, namely projected DP–Langevin unlearning Chien et al. (2024b), using its formally calibrated update rule; the full comparison is provided in Appendix M.

#### 4.2 U-LIRA (BLACK-BOX)

We evaluate our teleportation defense with U-LIRA Hayes et al. (2025), a state-of-the-art black-box unlearning auditor. Following Deep Unlearn Cadet et al. (2024a), we train  $T = 64$  shadow models with 10 random forget sets each. To model a strong adaptive adversary, shadows use the same unlearning algorithm, teleportation, and hyperparameters as the target, reducing proxy–target miscalibration Cretu et al. (2023). Details of U-LIRA appear in Appendix B.

As emphasized in prior work Carlini et al. (2022a), the most informative regime is low false-positive rates (FPR), where practical attacks must operate. We therefore report AUC as well as TPR@0.1, TPR@1, and TPR@5, which capture attacker success in this stringent regime. In addition, following RULI Naderloui et al. (2025), we stratify the *forget-set* by *memorization* (ranked by training

Table 1: **Privacy (Black-box) with and without WARP.** Reported are risks on *all forget samples* and the *most-memorized 1%* (AUC, TPR@0.1/1/5%), plus test accuracy. Each row shows baseline, WARP, and relative improvement (%).

| Method          | All samples (BB) |              |              |              | Most-memorized (top 1%) |              |              |              | Acc. Test    |
|-----------------|------------------|--------------|--------------|--------------|-------------------------|--------------|--------------|--------------|--------------|
|                 | AUC              | TPR@0.1      | TPR@1        | TPR@5        | AUC                     | TPR@0.1      | TPR@1        | TPR@5        |              |
| NGP (base)      | 0.545            | 0.012        | 0.030        | 0.077        | 0.649                   | 0.058        | 0.157        | 0.277        | <b>0.808</b> |
| <b>+ WARP</b>   | <b>0.516</b>     | <b>0.003</b> | <b>0.014</b> | <b>0.055</b> | <b>0.598</b>            | <b>0.015</b> | <b>0.082</b> | <b>0.206</b> | 0.797        |
| Improvement (%) | 64.4             | 81.8         | 80.0         | 81.5         | 34.2                    | 75.4         | 51.0         | 31.3         | -5.7         |
| SCRUB (base)    | 0.543            | 0.020        | 0.047        | 0.092        | 0.710                   | 0.086        | 0.227        | 0.397        | <b>0.815</b> |
| <b>+ WARP</b>   | <b>0.526</b>     | <b>0.015</b> | <b>0.036</b> | <b>0.078</b> | <b>0.610</b>            | <b>0.041</b> | <b>0.119</b> | <b>0.213</b> | 0.813        |
| Improvement (%) | 39.5             | 26.3         | 29.7         | 33.3         | 47.6                    | 52.9         | 49.8         | 53.0         | -1.1         |
| PGU (base)      | 0.636            | 0.024        | 0.040        | <b>0.098</b> | 0.910                   | 0.201        | 0.511        | 0.706        | 0.804        |
| <b>+ WARP</b>   | <b>0.631</b>     | <b>0.018</b> | <b>0.036</b> | 0.104        | <b>0.875</b>            | <b>0.160</b> | <b>0.431</b> | <b>0.663</b> | <b>0.808</b> |
| Improvement (%) | 3.7              | 26.1         | 13.3         | -12.5        | 8.5                     | 20.5         | 16.0         | 6.6          | +2.0         |
| Salun (base)    | 0.572            | 0.020        | 0.062        | 0.121        | 0.910                   | 0.129        | 0.321        | 0.520        | 0.802        |
| <b>+ WARP</b>   | <b>0.565</b>     | <b>0.019</b> | <b>0.059</b> | <b>0.113</b> | <b>0.826</b>            | <b>0.107</b> | <b>0.264</b> | <b>0.487</b> | <b>0.803</b> |
| Improvement (%) | 9.7              | 5.3          | 5.8          | 11.3         | 20.5                    | 17.2         | 18.3         | 7.0          | +0.5         |
| SF (base)       | 0.509            | 0.004        | 0.015        | 0.056        | 0.518                   | 0.089        | 0.034        | 0.079        | <b>0.814</b> |
| <b>+ WARP</b>   | <b>0.506</b>     | <b>0.002</b> | <b>0.012</b> | <b>0.051</b> | <b>0.501</b>            | <b>0.006</b> | <b>0.026</b> | <b>0.068</b> | 0.811        |
| Improvement (%) | 33.3             | 66.7         | 60.0         | 83.3         | 94.4                    | 94.3         | 33.3         | 37.9         | -1.6         |
| BT (base)       | 0.725            | 0.000        | 0.177        | 0.287        | 0.902                   | 0.119        | 0.295        | 0.582        | 0.816        |
| <b>+ WARP</b>   | <b>0.661</b>     | 0.000        | <b>0.137</b> | <b>0.219</b> | <b>0.865</b>            | <b>0.113</b> | <b>0.275</b> | <b>0.537</b> | <b>0.818</b> |
| Improvement (%) | 28.4             | -            | 24.0         | 28.7         | 9.2                     | 5.1          | 7.0          | 8.5          | +1.1         |

confidence) and evaluate U-LiRA on the most-memorized slice. These points carry elevated privacy risk, so we report low-FPR TPR on this subset alongside aggregate metrics.

Table 1 shows that adding our teleportation plug-in reduces black-box membership leakage across all methods, on both the full *forget-set* and the most-memorized slice, with the largest gains at low FPR. For example, NGP’s TPR@1 nearly halves (0.030→0.014), SCRUB’s memorized-slice AUC drops by 0.10 (0.710→0.610), and SF’s AUC falls to near-random (0.501). Low-FPR TPR gains are often large even when aggregate AUC shifts are modest, showing that teleportation suppresses the high-confidence tails attacks exploit. Some methods remain leaky on memorized points, but teleportation frequently drives this slice close to random without hurting accuracy. Its impact is strongest on TPR@0.1 and TPR@1, as retain-null-space projection reduces forget gradients and shrinks extreme margins, weakening the rare signals enabling low-FPR success.

### 4.3 WHITE-BOX MIA

We evaluate the Gaussian gradient-difference test of Section C under the setup of Section 4, using ResNet-18 on CIFAR-10 and ViT-B/16 on Tiny-ImageNet (full ViT in Appendix H). For the null background we draw  $m=1000$  non-members from  $\mathcal{D}_{\text{test}}$ , estimate  $(\hat{\mu}, \hat{\Sigma})$  with ridge  $\lambda=10^{-3}$ , and restrict the test to the top-10% most-variant  $\Delta(b)$  coordinates. Figure 3 shows ROC curves with and without teleportation (log-log for low-FPR). Across methods, teleported variants shift toward chance (TPR = FPR) and flatten between  $10^{-5}$ – $10^{-2}$  FPR, suppressing high-confidence tails. The strongest effect appears for BT and PGU, which show the largest AUC drops, while NGP, SF, and SALUN show smaller but consistent shifts. An exception is SCRUB, where teleportation lowers ROC above  $10^{-3}$  FPR but slightly raises TPR at  $< 10^{-3}$ , due to knowledge distillation interacting with symmetry moves that amplify high-leverage directions. Overall, null-space teleportation reduces white-box evidence at low FPR, with a narrow corner case for SCRUB.

### 4.4 RECONSTRUCTION ATTACK RESULTS

We evaluate the white-box reconstruction attack of Section 3.1 on **ImageNet-1K** with **ResNet-18**, focusing on **NGP**. We reconstruct a *single* forgotten example and average over **100** uniformly sampled points. For each target we use a retain minibatch of size  $|\mathcal{B}_r| = 5$ . Subspace projectors are built per layer from probe gradients: we draw  $m=100$  training samples to form  $G_{\text{org}}, G_u$ , compute thin SVDs, and keep rank  $k$  preserving **90%** gradient energy. We then apply  $\Pi_u^\perp$  and  $\Pi_{\text{org}}$  layerwise to

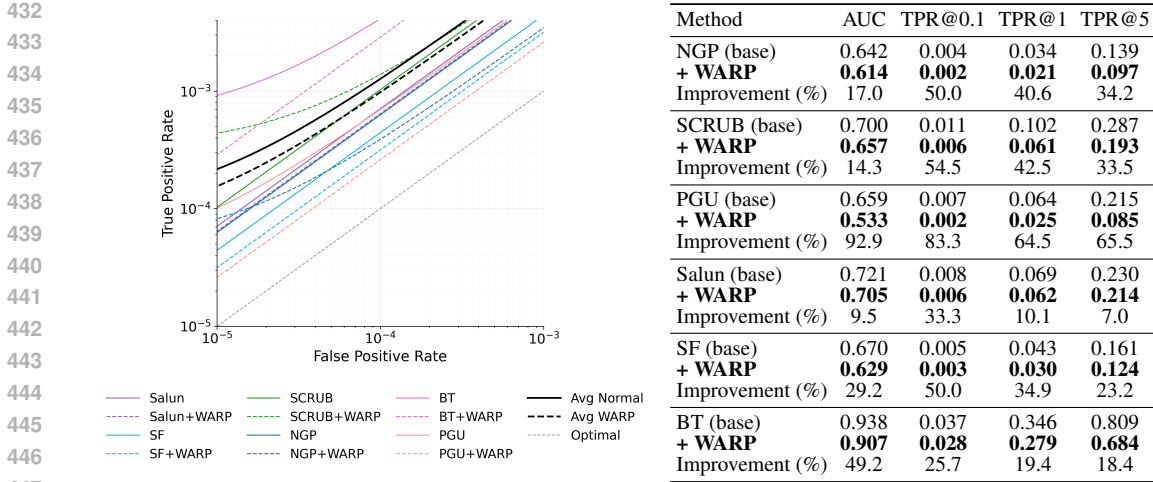

Figure 3: **White-box privacy with and without WARP.** Gaussian gradient-diff test on 640 unlearned models. ROC curves (left) and AUC/TPRs (right); full ROC plots are in Appendix F.

Table 2: **Effect of teleportation defense** on reconstruction (ImageNet-1K, ResNet-18, NGP).

| Variant                           | PSNR (dB) ↑  | LPIPS (VGG) ↓ | LPIPS (Alex) ↓ | SSIM ↑       | Test MSE ↓   | Feat MSE ↓   |
|-----------------------------------|--------------|---------------|----------------|--------------|--------------|--------------|
| Ours (normal unlearning)          | 10.74 ± 0.31 | 0.56 ± 0.013  | 0.34 ± 0.015   | 0.12 ± 0.008 | 0.10 ± 0.007 | 5.39 ± 0.50  |
| Ours + WARP                       | 7.38 ± 0.40  | 0.68 ± 0.01   | 0.46 ± 0.02    | 0.08 ± 0.006 | 0.21 ± 0.02  | 11.28 ± 1.89 |
| <i>Improvement of Defense (%)</i> | +45.5        | +21.2         | +26.1          | +31.6        | +52.4        | +52.2        |

obtain the filtered target  $\tilde{g}_f$ . The attacker knows the label  $y_f$  and optimizes equation 4 with a TV regularizer Geiping et al. (2020). The matching loss uses *masked* per-layer gradients: for each layer, all coordinates are kept and a weighted dot-product alignment is computed Fang et al. (2023).

**Effect of teleportation.** Table 2 and Figure 4 compare reconstruction risk under standard NGP unlearning and its teleported variant using change-of-basis reparameterization. Despite negligible cost, this symmetry-based randomization disrupts reconstruction: even strong generative-prior attacks fail to recover meaningful features of forgotten data. Teleportation injects a symmetry component into  $\Delta\theta$  that is nearly orthogonal to per-sample gradients Armenta et al. (2023), reducing alignment with the true forget gradient  $g_f$  and driving gradient-matching toward low signal-to-noise optima. It also undermines our subspace-filtered attack (Eq. 3), since teleportation reshapes gradient subspaces so  $U_{\text{org}}$  and  $U_u$  overlap little, leaving the residual  $\Pi_{\text{org}}\Pi_u^\perp(-\Delta\theta/\eta)$  small and noisy. In practice, optimization collapses to the generative prior or class cues, yielding label-consistent but semantically poor reconstructions (Figure 4). Symmetry moves thus decouple updates from data-dependent directions, removing the geometric handle exploited by white-box reconstruction. [This motivates examining how teleportation reshapes the information relationship between parameters and training data \(forget-set\); a stronger symmetry-aware adaptive reconstruction attack is evaluated in Appendix N, and Appendix O provides complementary information-theoretic bounds showing how teleportation expands the symmetry orbit and increases expected reconstruction error.](#)

## 5 CONCLUSION AND FUTURE WORK

Approximate unlearning provides scalability but introduces privacy risks. We showed that adversaries with access to original and unlearned models can mount strong membership inference and reconstruction attacks. These risks stem from two properties: parameter proximity and large forget-set gradient norms, which amplify leakage.

To counter this, we proposed WARP, a symmetry-based defense that interleaves teleportation with unlearning. By exploiting network symmetries, WARP reduces forget-set gradient energy and displaces parameters in symmetry-preserving directions, weakening both membership and

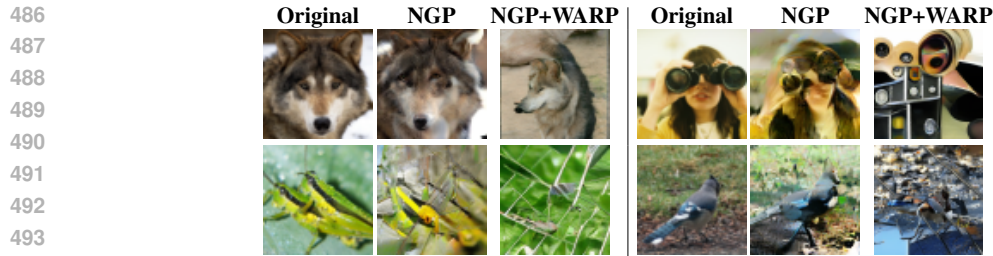Figure 4: **Reconstructions under NGP vs. NGP+WARP.**

reconstruction leakage while preserving retain performance. Across six unlearning algorithms, WARP improves privacy, cutting adversarial advantage by up to 64% in black-box and 92% in white-box settings. We also stress the need for white-box auditing: methods seemingly robust in black-box mode (e.g., SF Huang et al. (2024)) still leak when gradients are exposed. Even simple teleportation disrupts reconstruction, reducing quality by  $\sim 45\%$ .

Our findings suggest future directions. First, extending Langevin-based privacy analyses to practical unlearning with gradient ascent and symmetry moves is promising. Second, recent work shows approximate unlearning leaves low-rank weight signals, reversible via re-unlearning Fan et al. (2025) or removed by quantization Zhang et al. (2024). Exploring teleportation directly on weights may help obscure these signals and mitigate reversals. Finally, as the study of neural network symmetries continues to evolve and more efficient estimators and richer invariance families become available, WARP can directly inherit these advances by instantiating its symmetry map with stronger or cheaper symmetry mechanisms, which further strengthens its resistance to unlearning attacks.

## REFERENCES

- Marco Armenta and Pierre-Marc Jodoin. The representation theory of neural networks. *Mathematics*, 9(24):3216, 2021.
- Marco Armenta, Thierry Judge, Nathan Painchaud, Youssef Skandarani, Carl Lemaire, Gabriel Gibeau Sanchez, Philippe Spino, and Pierre-Marc Jodoin. Neural teleportation. *Mathematics*, 11(2):480, 2023.
- Sanjeev Arora, Simon Du, Wei Hu, Zhiyuan Li, and Ruosong Wang. Fine-grained analysis of optimization and generalization for overparameterized two-layer neural networks. In *International conference on machine learning*, pp. 322–332. PMLR, 2019.
- Vijay Badrinarayanan, Bamdev Mishra, and Roberto Cipolla. Symmetry-invariant optimization in deep networks. *arXiv preprint arXiv:1511.01754*, 2015.
- Haolei Bai, Siyong Jian, Tuo Liang, Yu Yin, and Huan Wang. Rssvd: Residual compensated svd for large language model compression. *arXiv preprint arXiv:2505.20112*, 2025.
- Martin Bertran, Shuai Tang, Michael Kearns, Jamie H Morgenstern, Aaron Roth, and Steven Z Wu. Reconstruction attacks on machine unlearning: Simple models are vulnerable. *Advances in Neural Information Processing Systems*, 37:104995–105016, 2024.
- Lucas Bourtole, Varun Chandrasekaran, Christopher A Choquette-Choo, Hengrui Jia, Adelin Travers, Baiwu Zhang, David Lie, and Nicolas Papernot. Machine unlearning. In *2021 IEEE symposium on security and privacy (SP)*, pp. 141–159. IEEE, 2021.
- Tom Brown, Benjamin Mann, Nick Ryder, Melanie Subbiah, Jared D Kaplan, Prafulla Dhariwal, Arvind Neelakantan, Pranav Shyam, Girish Sastry, Amanda Askell, et al. Language models are few-shot learners. *Advances in neural information processing systems*, 33:1877–1901, 2020.
- Xavier F Cadet, Anastasia Borovykh, Mohammad Malekzadeh, Sara Ahmadi-Abhari, and Hamed Haddadi. Deep unlearn: Benchmarking machine unlearning. *arXiv preprint arXiv:2410.01276*, 2024a.

- 540 Xavier F. Cadet, Anastasia Borovykh, Mohammad Malekzadeh, Sara Ahmadi-Abhari, and Hamed  
541 Haddadi. Deep Unlearn: Benchmarking Machine Unlearning, October 2024b. URL <http://arxiv.org/abs/2410.01276>. arXiv:2410.01276 [cs].
- 542  
543 Yinzhi Cao and Junfeng Yang. Towards making systems forget with machine unlearning. In *2015*  
544 *IEEE symposium on security and privacy*, pp. 463–480. IEEE, 2015.
- 545  
546 Nicholas Carlini, Steve Chien, Milad Nasr, Shuang Song, Andreas Terzis, and Florian Tramer.  
547 Membership inference attacks from first principles. In *2022 IEEE symposium on security and*  
548 *privacy (SP)*, pp. 1897–1914. IEEE, 2022a.
- 549  
550 Nicholas Carlini, Matthew Jagielski, Chiyuan Zhang, Nicolas Papernot, Andreas Terzis, and Florian  
551 Tramer. The privacy onion effect: Memorization is relative. *Advances in Neural Information*  
552 *Processing Systems*, 35:13263–13276, 2022b.
- 553  
554 Sungmin Cha, Sungjun Cho, Dasol Hwang, Honglak Lee, Taesup Moon, and Moontae Lee. Learning  
555 to unlearn: Instance-wise unlearning for pre-trained classifiers. In *Proceedings of the AAAI*  
*conference on artificial intelligence*, volume 38, pp. 11186–11194, 2024.
- 556  
557 Min Chen, Zhikun Zhang, Tianhao Wang, Michael Backes, Mathias Humbert, and Yang Zhang. When  
558 machine unlearning jeopardizes privacy. In *Proceedings of the 2021 ACM SIGSAC conference on*  
*computer and communications security*, pp. 896–911, 2021.
- 559  
560 Eli Chien, Haoyu Wang, Ziang Chen, and Pan Li. Certified machine unlearning via noisy stochastic  
561 gradient descent. *Advances in Neural Information Processing Systems*, 37:38852–38887, 2024a.
- 562  
563 Eli Chien, Haoyu Wang, Ziang Chen, and Pan Li. Langevin unlearning: A new perspective of noisy  
564 gradient descent for machine unlearning. *Advances in neural information processing systems*, 37:  
79666–79703, 2024b.
- 565  
566 Vikram S Chundawat, Ayush K Tarun, Murari Mandal, and Mohan Kankanhalli. Can bad teaching  
567 induce forgetting? unlearning in deep networks using an incompetent teacher. In *Proceedings of*  
*the AAAI Conference on Artificial Intelligence*, pp. 7210–7217, 2023a.
- 568  
569 Vikram S Chundawat, Ayush K Tarun, Murari Mandal, and Mohan Kankanhalli. Zero-shot machine  
570 unlearning. *IEEE Transactions on Information Forensics and Security*, 18:2345–2354, 2023b.
- 571  
572 Ana-Maria Cretu, Daniel Jones, Yves-Alexandre de Montjoye, and Shruti Tople. Investigating  
573 the effect of misalignment on membership privacy in the white-box setting. *arXiv preprint*  
*arXiv:2306.05093*, 2023.
- 574  
575 Simon S Du, Wei Hu, and Jason D Lee. Algorithmic regularization in learning deep homogeneous  
576 models: Layers are automatically balanced. *Advances in neural information processing systems*,  
31, 2018.
- 577  
578 Chongyu Fan, Jiancheng Liu, Yihua Zhang, Eric Wong, Dennis Wei, and Sijia Liu. Salun: Em-  
579 powering machine unlearning via gradient-based weight saliency in both image classification and  
580 generation. *arXiv preprint arXiv:2310.12508*, 2023.
- 581  
582 Chongyu Fan, Jiancheng Liu, Alfred Hero, and Sijia Liu. Challenging forgets: Unveiling the worst-  
583 case forget sets in machine unlearning. In *European Conference on Computer Vision*, pp. 278–297.  
Springer, 2024.
- 584  
585 Chongyu Fan, Jinghan Jia, Yihua Zhang, Anil Ramakrishna, Mingyi Hong, and Sijia Liu. Towards  
586 llm unlearning resilient to relearning attacks: A sharpness-aware minimization perspective and  
587 beyond. *arXiv preprint arXiv:2502.05374*, 2025.
- 588  
589 Hao Fang, Bin Chen, Xuan Wang, Zhi Wang, and Shu-Tao Xia. Gifd: A generative gradient  
590 inversion method with feature domain optimization. In *Proceedings of the IEEE/CVF International*  
*Conference on Computer Vision*, pp. 4967–4976, 2023.
- 591  
592 Stanislav Fort, Gintare Karolina Dziugaite, Maithra Raghu Paul, Surya Ganguli, and David J. Schwab.  
593 Deep learning versus kernel learning: An empirical study of loss landscape geometry and the time  
evolution of the neural tangent kernel. In *Advances in Neural Information Processing Systems*,  
volume 33, pp. 5850–5861, 2020.

- 594 Jonas Geiping, Hartmut Bauermeister, Hannah Dröge, and Michael Moeller. Inverting gradients-how  
595 easy is it to break privacy in federated learning? *Advances in neural information processing*  
596 *systems*, 33:16937–16947, 2020.
- 597 Kristian Georgiev, Roy Rinberg, Sung Min Park, Shivam Garg, Andrew Ilyas, Aleksander Madry,  
598 and Seth Neel. Attribute-to-delete: Machine unlearning via datamodel matching. *arXiv preprint*  
599 *arXiv:2410.23232*, 2024.
- 600  
601 Behrooz Ghorbani, Shankar Krishnan, and Ying Xiao. An investigation into neural net optimization  
602 via hessian eigenvalue density. In *Proceedings of the 36th International Conference on Machine*  
603 *Learning (ICML)*, volume 97 of *Proceedings of Machine Learning Research*, pp. 2232–2241.  
604 PMLR, 2019.
- 605  
606 Grzegorz Gluch and Rüdiger Urbanke. Noether: The more things change, the more stay the same.  
607 *arXiv preprint arXiv:2104.05508*, 2021.
- 608  
609 Aditya Golatkar, Alessandro Achille, and Stefano Soatto. Forgetting outside the box: Scrubbing deep  
610 networks of information accessible from input-output observations. In *European Conference on*  
611 *Computer Vision*, pp. 383–398. Springer, 2020.
- 612  
613 Gene H. Golub and Charles F. Van Loan. *Matrix Computations*. Johns Hopkins University Press,  
614 Baltimore, MD, 4 edition, 2013.
- 615  
616 Laura Graves, Vineel Nagisetty, and Vijay Ganesh. Amnesiac machine learning. In *Proceedings of*  
617 *the AAAI Conference on Artificial Intelligence*, volume 35, pp. 11516–11524, 2021.
- 618  
619 Chiyuan Guo, Tom Goldstein, Awni Hannun, and Laurens van der Maaten. Certified data removal  
620 from machine learning models. In *International Conference on Machine Learning*, pp. 3832–3842.  
621 PMLR, 2020.
- 622  
623 Guy Gur-Ari, Daniel A. Roberts, and Ethan Dyer. Gradient descent happens in a tiny subspace. *arXiv*  
624 *preprint arXiv:1812.04754*, 2018.
- 625  
626 Nathan Halko, Per-Gunnar Martinsson, and Joel A. Tropp. Finding structure with randomness:  
627 Probabilistic algorithms for constructing approximate matrix decompositions. *SIAM Review*, 53  
628 (2):217–288, 2011.
- 629  
630 Jamie Hayes, Ilia Shumailov, Eleni Triantafillou, Amr Khalifa, and Nicolas Papernot. Inexact  
631 unlearning needs more careful evaluations to avoid a false sense of privacy. In *2025 IEEE*  
632 *Conference on Secure and Trustworthy Machine Learning (SaTML)*, pp. 497–519. IEEE, 2025.
- 633  
634 Tuan Hoang, Santu Rana, Sunil Gupta, and Svetha Venkatesh. Learn to unlearn for deep neural  
635 networks: Minimizing unlearning interference with gradient projection. In *Proceedings of the*  
636 *IEEE/CVF Winter Conference on Applications of Computer Vision*, pp. 4819–4828, 2024.
- 637  
638 Yen-Chang Hsu, Ting Hua, Sungen Chang, Qian Lou, Yilin Shen, and Hongxia Jin. Language model  
639 compression with weighted low-rank factorization. *arXiv preprint arXiv:2207.00112*, 2022.
- 640  
641 Hongsheng Hu, Shuo Wang, Tian Dong, and Minhui Xue. Learn what you want to unlearn: Unlearning  
642 inversion attacks against machine unlearning. In *2024 IEEE Symposium on Security and Privacy*  
643 *(SP)*, pp. 3257–3275. IEEE, 2024.
- 644  
645 Zhehao Huang, Xinwen Cheng, JingHao Zheng, Haoran Wang, Zhengbao He, Tao Li, and Xiaolin  
646 Huang. Unified gradient-based machine unlearning with remain geometry enhancement. *Advances*  
647 *in Neural Information Processing Systems*, 37:26377–26414, 2024.
- 648  
649 Jinwoo Jeon, Kangwook Lee, Sewoong Oh, Jungseul Ok, et al. Gradient inversion with generative  
650 image prior. *Advances in neural information processing systems*, 34:29898–29908, 2021.
- 651  
652 Daniel Kunin, Javier Sagastuy-Brena, Surya Ganguli, Daniel LK Yamins, and Hidenori Tanaka.  
653 Neural mechanics: Symmetry and broken conservation laws in deep learning dynamics. *arXiv*  
654 *preprint arXiv:2012.04728*, 2020.

- 648 Meghdad Kurmanji, Peter Triantafillou, Jamie Hayes, and Eleni Triantafillou. Towards unbounded  
649 machine unlearning. *Advances in neural information processing systems*, 36:1957–1987, 2023.
- 650
- 651 Tobias Leemann, Martin Pawelczyk, and Gjergji Kasneci. Gaussian membership inference privacy.  
652 *Advances in Neural Information Processing Systems*, 36:73866–73878, 2023.
- 653
- 654 Zhuohang Li, Jiaxin Zhang, Luyang Liu, and Jian Liu. Auditing privacy defenses in federated  
655 learning via generative gradient leakage. In *Proceedings of the IEEE/CVF conference on computer  
656 vision and pattern recognition*, pp. 10132–10142, 2022.
- 657
- 658 Junxu Liu, Mingsheng Xue, Jian Lou, Xiaoyu Zhang, Li Xiong, and Zhan Qin. Muter: Machine  
659 unlearning on adversarially trained models. In *Proceedings of the IEEE/CVF international  
660 conference on computer vision*, pp. 4892–4902, 2023.
- 661
- 662 Ronak Mehta, Sourav Pal, Vikas Singh, and Sathya N Ravi. Deep unlearning via randomized  
663 conditionally independent Hessians. In *Proceedings of the IEEE/CVF Conference on Computer  
664 Vision and Pattern Recognition*, pp. 10422–10431, 2022.
- 665
- 666 Ioannis Mitliagkas, Constantine Caramanis, Prateek Jain, Shiva Prasad Kasiviswanathan, and Sanjiv  
667 Kumar. Memory limited, streaming PCA. In *Advances in Neural Information Processing Systems*,  
668 volume 26, 2013.
- 669
- 670 Cameron Musco and Christopher Musco. Randomized block krylov methods for stronger and faster  
671 approximate singular value decomposition. In *Advances in Neural Information Processing Systems*,  
672 volume 28, 2015.
- 673
- 674 Nima Naderloui, Shenao Yan, Binghui Wang, Jie Fu, Wendy Hui Wang, Weiran Liu, and Yuan Hong.  
675 Rectifying privacy and efficacy measurements in machine unlearning: A new inference attack  
676 perspective. *arXiv preprint arXiv:2506.13009*, 2025.
- 677
- 678 Milad Nasr, Reza Shokri, and Amir Houmansadr. Comprehensive privacy analysis of deep learning:  
679 Passive and active white-box inference attacks against centralized and federated learning. In *2019  
680 IEEE symposium on security and privacy (SP)*, pp. 739–753. IEEE, 2019.
- 681
- 682 Thanh Tam Nguyen, Thanh Trung Huynh, Zhao Ren, Phi Le Nguyen, Alan Wee-Chung Liew,  
683 Hongzhi Yin, and Quoc Viet Hung Nguyen. A survey of machine unlearning. *arXiv preprint  
684 arXiv:2209.02299*, 2022.
- 685
- 686 Erkki Oja. A simplified neuron model as a principal component analyzer. *Journal of Mathematical  
687 Biology*, 15(3):267–273, 1982.
- 688
- 689 Xinbao Qiao, Meng Zhang, Ming Tang, and Ermin Wei. Hessian-free online certified unlearning.  
690 *arXiv preprint arXiv:2404.01712*, 2024.
- 691
- 692 Deepak Ravikumar, Efstathia Soufleri, Abolfazl Hashemi, and Kaushik Roy. Unveiling privacy,  
693 memorization, and input curvature links. *arXiv preprint arXiv:2402.18726*, 2024a.
- 694
- 695 Deepak Ravikumar, Efstathia Soufleri, and Kaushik Roy. Curvature clues: Decoding deep learning  
696 privacy with input loss curvature. *Advances in Neural Information Processing Systems*, 37:  
697 20003–20030, 2024b.
- 698
- 699 Maria Rigaki and Sebastian Garcia. A survey of privacy attacks in machine learning. *ACM Computing  
700 Surveys*, 56(4):1–34, 2023.
- 701
- 702 Charbel Sakr and Brucek Khailany. Espace: Dimensionality reduction of activations for model  
703 compression. *Advances in Neural Information Processing Systems*, 37:17489–17517, 2024.
- 704
- 705 Ahmed Salem, Apratim Bhattacharya, Michael Backes, Mario Fritz, and Yang Zhang. {Updates-  
706 Leak}: Data set inference and reconstruction attacks in online learning. In *29th USENIX security  
707 symposium (USENIX Security 20)*, pp. 1291–1308, 2020.
- 708
- 709 Seonguk Seo, Dongwan Kim, and Bohyung Han. Revisiting machine unlearning with dimensional  
710 alignment. In *2025 IEEE/CVF Winter Conference on Applications of Computer Vision (WACV)*,  
711 pp. 3206–3215. IEEE, 2025.

- 702 Nazanin Mohammadi Sepahvand, Anvith Thudi, Berivan Isik, Ashmita Bhattacharyya, Nicolas  
703 Papernot, Eleni Triantafillou, Daniel M Roy, and Gintare Karolina Dziugaite. Leveraging per-  
704 instance privacy for machine unlearning. *arXiv preprint arXiv:2505.18786*, 2025.
- 705  
706 Reza Shokri, Marco Stronati, Congzheng Song, and Vitaly Shmatikov. Membership inference attacks  
707 against machine learning models. In *2017 IEEE symposium on security and privacy (SP)*, pp. 3–18.  
708 IEEE, 2017.
- 709 Berfin Simsek, François Ged, Arthur Jacot, Francesco Spadaro, Clément Hongler, Wulfram Gerstner,  
710 and Johanni Brea. Geometry of the loss landscape in overparameterized neural networks: Symme-  
711 tries and invariances. In *International Conference on Machine Learning*, pp. 9722–9732. PMLR,  
712 2021.
- 713 Anvith Thudi, Gabriel Deza, Varun Chandrasekaran, and Nicolas Papernot. Unrolling sgd: Under-  
714 standing factors influencing machine unlearning. In *2022 IEEE 7th European Symposium on*  
715 *Security and Privacy (EuroS&P)*, pp. 303–319. IEEE, 2022.
- 716  
717 Marlon Tobaben, Gauri Pradhan, Yuan He, Joonas Jälkö, and Antti Honkela. Understanding practical  
718 membership privacy of deep learning. In *Privacy Regulation and Protection in Machine Learning*,  
719 2024.
- 720 Hugo Touvron, Thibaut Lavril, Gautier Izacard, Xavier Martinet, Marie-Anne Lachaux, Timothée  
721 Lacroix, Baptiste Rozière, Naman Goyal, Eric Hambro, Faisal Azhar, et al. Llama: Open and  
722 efficient foundation language models. *arXiv preprint arXiv:2302.13971*, 2023.
- 723  
724 Joel A. Tropp, Alp Yurtsever, Madeleine Udell, and Volkan Cevher. Practical sketching algorithms  
725 for low-rank matrix approximation. *SIAM Journal on Matrix Analysis and Applications*, 38(4):  
726 1454–1485, 2017.
- 727 Jana Vatter, Ruben Mayer, and Hans-Arno Jacobsen. The evolution of distributed systems for graph  
728 neural networks and their origin in graph processing and deep learning: A survey. *ACM Computing*  
729 *Surveys*, 56(1):1–37, 2023.
- 730 Qiyuan Wang, Ruiling Xu, Shibo He, Randall Berry, and Meng Zhang. Unlearning incentivizes  
731 learning under privacy risk. In *Proceedings of the ACM on Web Conference 2025*, pp. 1456–1467,  
732 2025a.
- 733  
734 Xin Wang, Yu Zheng, Zhongwei Wan, and Mi Zhang. Svd-llm: Truncation-aware singular value  
735 decomposition for large language model compression. *arXiv preprint arXiv:2403.07378*, 2024.
- 736  
737 Xin Wang, Samiul Alam, Zhongwei Wan, Hui Shen, and Mi Zhang. Svd-llm v2: Optimizing singular  
738 value truncation for large language model compression. *arXiv preprint arXiv:2503.12340*, 2025b.
- 739 Manfred K. Warmuth and Dima Kuzmin. Randomized online PCA algorithms with regret bounds.  
740 *Journal of Machine Learning Research*, 9(10):2287–2320, 2008.
- 741 David P. Woodruff. Sketching as a tool for numerical linear algebra. *Foundations and Trends in*  
742 *Theoretical Computer Science*, 10(1–2):1–157, 2014.
- 743  
744 Zihao Wu, Juncheng Dong, Ahmed Aloui, and Vahid Tarokh. Teleportation with null space gradient  
745 projection for optimization acceleration. *arXiv preprint arXiv:2502.11362*, 2025.
- 746  
747 Song Xia, Yi Yu, Wenhan Yang, Meiwen Ding, Zhuo Chen, Ling-Yu Duan, Alex C Kot, and Xudong  
748 Jiang. Theoretical insights in model inversion robustness and conditional entropy maximization for  
749 collaborative inference systems. In *Proceedings of the Computer Vision and Pattern Recognition*  
750 *Conference*, pp. 8753–8763, 2025.
- 751  
752 Jiayuan Ye, Zhenyu Zhu, Fanghui Liu, Reza Shokri, and Volkan Cevher. Initialization matters:  
753 Privacy-utility analysis of overparameterized neural networks. *Advances in Neural Information*  
754 *Processing Systems*, 36:5419–5446, 2023.
- 755  
756 Hongxu Yin, Arun Mallya, Arash Vahdat, Jose M Alvarez, Jan Kautz, and Pavlo Molchanov. See  
757 through gradients: Image batch recovery via gradinversion. In *Proceedings of the IEEE/CVF*  
758 *conference on computer vision and pattern recognition*, pp. 16337–16346, 2021.

Zhiwei Zhang, Fali Wang, Xiaomin Li, Zongyu Wu, Xianfeng Tang, Hui Liu, Qi He, Wenpeng Yin, and Suhang Wang. Catastrophic failure of llm unlearning via quantization. *arXiv preprint arXiv:2410.16454*, 2024.

Bo Zhao, Nima Dehmamy, Robin Walters, and Rose Yu. Symmetry teleportation for accelerated optimization. *Advances in neural information processing systems*, 35:16679–16690, 2022.

Bo Zhao, Robert M Gower, Robin Walters, and Rose Yu. Improving convergence and generalization using parameter symmetries. *arXiv preprint arXiv:2305.13404*, 2023.

Kairan Zhao, Meghdad Kurmanji, George-Octavian Bărbulescu, Eleni Triantafillou, and Peter Triantafillou. What makes unlearning hard and what to do about it. *Advances in Neural Information Processing Systems*, 37:12293–12333, 2024.

## A RELATED WORK

**Approximate Unlearning.** The removal of training samples was introduced by Cao & Yang (2015) in the context of the “right to be forgotten.” Retraining from scratch guarantees deletion but is infeasible for modern networks Vatter et al. (2023). Exact unlearning methods such as SISA Bourtole et al. (2021) and Amnesiac Unlearning Graves et al. (2021) lower cost through partitioning or selective retraining but still require storage and scale poorly Nguyen et al. (2022).

Approximate unlearning directly updates the trained model to erase the *forget-set* Kurmanji et al. (2023); Chundawat et al. (2023a); Golatkar et al. (2020); Thudi et al. (2022). These methods aim to match the predictive distribution of retraining while preserving retain accuracy, offering a practical forgetting–utility trade-off with large savings in computation and memory. Related methods target structured forget sets such as entire classes Chundawat et al. (2023b); Seo et al. (2025), or tackle the harder instance-wise setting, where arbitrary samples must be removed Fan et al. (2024); Cha et al. (2024); Zhao et al. (2024). Many approaches rely on training-time side information like per-sample gradients Qiao et al. (2024); Mehta et al. (2022), or assume specialized regimes with adversarial robustness Liu et al. (2023) or differential-privacy noise Chien et al. (2024b;a); Sepahvand et al. (2025). While effective, these assumptions add resource overhead, limiting post-hoc use. Our focus, therefore, is training-agnostic, instance-wise unlearning that takes only a pretrained classifier and a designated *forget-set*, without stored gradients or training modifications Kurmanji et al. (2023); Thudi et al. (2022).

**Privacy Unlearning.** The effectiveness of approximate unlearning is accessed by two criteria: (I) the model should maintain accuracy on non-forgotten data, and (II) its outputs on the *forget-set* should be indistinguishable from those of a model with no access to it Naderloui et al. (2025). In practice, this is evaluated using MIA Shokri et al. (2017); Carlini et al. (2022a), which test whether a sample was part of training. Effective unlearning removes this membership advantage on the *forget-set*.

Most prior work evaluates unlearning by comparing outputs of the unlearned model to a retrained reference on the *forget-set* Cadet et al. (2024b); Kurmanji et al. (2023); Hayes et al. (2025); Georgiev et al. (2024); Naderloui et al. (2025) Cadet et al. (2024a); Kurmanji et al. (2023); Hayes et al. (2025); Georgiev et al. (2024); Naderloui et al. (2025). This black-box view ignores parameters, even though in practice—such as MU on edge devices—an adversary may access both original and unlearned models. Some studies consider this stronger setting: Chen et al. (2021) showed that output-comparison across models can detect unlearning, while others adapted reconstruction to infer forgotten data from parameter differences Salem et al. (2020); Hu et al. (2024); Bertran et al. (2024). These works, however, are limited to toy models and simplified updates, leaving privacy risk under realistic conditions unclear. In particular, they do not capture the robustness of recent multi-step approximate methods such as NGP or SCRUB Kurmanji et al. (2023); Chundawat et al. (2023a), where iterative updates with retain-set supervision weaken inversion of *forget-set* gradients. We address this gap with stronger white-box MIAs (Sec.C) and DRAs (Sec.3.1) tailored to realistic unlearning.

**Neural Network Symmetry.** Continuous symmetries in neural networks arise when transformations of the weights leave the output unchanged. Such invariances, a byproduct of overparameterization,

mean that many distinct weight configurations represent the same function Gluch & Urbanke (2021). They appear in homogeneous activations Badrinarayanan et al. (2015); Du et al. (2018) and in components like softmax and batch normalization Kunin et al. (2020), and have been linked to both improved optimization and generalization. Neural teleportation leverages these symmetries by relocating parameters within the loss-invariant level set, yielding equivalent models that accelerate optimization Armenta & Jodoin (2021); Armenta et al. (2023). Building on this idea, Zhao et al. (2022) introduced symmetry teleportation, which searches for beneficial relocations while providing a framework for analyzing symmetry-induced minima. More recently, teleportation with null-space gradient projection Wu et al. (2025) leverages the input null space: moving along projected directions leaves the function unchanged, directly aligning with the goal of teleportation.

## B U-LIRA ALGORITHM

To evaluate sample-wise privacy leakage, we employ the U-LiRA attack Cadet et al. (2024a); Hayes et al. (2025), an adaptation of LiRA Carlini et al. (2022a) to the unlearning setting. The attack relies on shadow models to estimate two distributions for a target sample  $(x, y)$ : (i) models trained with  $(x, y)$  and subsequently unlearned using the same unlearning algorithm, and (ii) models trained from scratch without  $(x, y)$ . By fitting simple parametric models (e.g., Gaussians) to the outputs of these shadow ensembles, U-LiRA computes the likelihood of the target model’s output under each case and classifies membership according to a likelihood ratio test.

Crucially, all shadow models are trained with the *same unlearning algorithm and hyperparameters* as the audited model. This makes U-LiRA effectively an *adaptive attack*, since it tailors the proxies to each specific unlearning method. Such alignment minimizes miscalibration between shadow and target models and is known to increase attack success Cretu et al. (2023). Therefore, U-LiRA serves as a strong black-box baseline for auditing privacy in unlearning. A complete description of the algorithm can be demonstrated in Algorithm 1.

---

### Algorithm 1 U-LiRA (used for auditing unlearning)

---

**Require:** Target model  $\theta^*$ , learning algorithm  $A$ , unlearning algorithm  $U$ , number of shadows  $T$ , sample  $(x, y)$

**Ensure:** Prediction: is  $(x, y)$  in the *forget-set*?

- 1: Initialize empty lists  $O \leftarrow \{\}$  and  $\hat{O} \leftarrow \{\}$
- 2: **for**  $t = 1$  to  $T$  **do**
- 3:     Sample dataset  $D$  containing  $(x, y)$
- 4:     Train  $\theta^0 \leftarrow A(D)$
- 5:     Unlearn  $\theta^f \leftarrow U(\theta^0, \{(x, y)\})$
- 6:     Retrain  $\theta^r \leftarrow A(D \setminus \{(x, y)\})$
- 7:     Record  $O[t] \leftarrow f(x; \theta^f)_y$ ,  $\hat{O}[t] \leftarrow f(x; \theta^r)_y$
- 8: **end for**
- 9: Fit Gaussian  $(\mu, \sigma^2)$  to  $O$ , and  $(\hat{\mu}, \hat{\sigma}^2)$  to  $\hat{O}$
- 10: Compute  $o^* \leftarrow f(x; \theta^*)_y$
- 11: Compute likelihood ratio:

$$p_{\text{member}} = \frac{\mathcal{N}(o^*; \mu, \sigma^2)}{\mathcal{N}(o^*; \mu, \sigma^2) + \mathcal{N}(o^*; \hat{\mu}, \hat{\sigma}^2)}$$

- 12: **if**  $p_{\text{member}} > 0.5$  **then**
  - 13:     **return** “member of training”
  - 14: **else**
  - 15:     **return** “non-member”
  - 16: **end if**
- 

## C WHITE-BOX GAUSSIAN GRADIENT-DIFFERENCE ATTACK ALGORITHM

Guided by the GLiR framework of Leemann et al. (2023), we formulate sample-wise MIA in the unlearning setting as a binary hypothesis test that uses *both* the pre-unlearning and post-unlearning

models. Let  $A$  denote the training algorithm,  $U$  the unlearning operator,  $S$  the original training set, and  $F \subseteq S$  the forget subset. For a candidate example  $(x, y)$ , we test

$$H_0 : (x, y) \sim \mathcal{D}_{\text{test}}, \quad (\theta^{\text{org}}, \theta^u) = (A(S), U(A(S), F)) \text{ with } x \notin S, x \notin F,$$

$$H_1 : (x, y) \in \mathcal{D}_{\text{forg}}, \quad (\theta^{\text{org}}, \theta^u) = (A(S), U(A(S), F)) \text{ with } x \in S \text{ and } x \in F,$$

i.e., under  $H_1$  the point participated in the original training and was subsequently targeted by unlearning, whereas under  $H_0$  it was never used. With white-box access, we form the gradient-difference statistic

$$\Delta(x) = \nabla_{\theta} \ell(f(x; \theta^u), y) - \nabla_{\theta} \ell(f(x; \theta^{\text{org}}), y) \in \mathbb{R}^d.$$

Assuming access to draws from  $\mathcal{D}_{\text{test}}$ , the adversary builds a background set  $B = \{(b_i, \tilde{y}_i)\}_{i=1}^m \sim \mathcal{D}_{\text{test}}^m$  and estimates the null (non-member) distribution of gradient differences via

$$\hat{\mu} = \frac{1}{m} \sum_{i=1}^m \Delta(b_i), \quad \hat{\Sigma} = \frac{1}{m-1} \sum_{i=1}^m (\Delta(b_i) - \hat{\mu})(\Delta(b_i) - \hat{\mu})^{\top}.$$

Following Leemann et al. (2023), we adopt a Gaussian model for  $\Delta(x)$  under  $H_0$  and compute the whitened Mahalanobis statistic

$$s(x) = (\Delta(x) - \hat{\mu})^{\top} (\hat{\Sigma} + \lambda I)^{-1} (\Delta(x) - \hat{\mu}),$$

with a small ridge  $\lambda > 0$  for numerical stability. Under  $H_0$ ,  $s(x)$  is approximately  $\chi_d^2$ -distributed, yielding the log- $p$ -value score

$$A'(x, y) = -\log\left(1 - F_{\chi_d^2}(s(x))\right),$$

and the final decision rule

$$A(x, y) = \mathbb{I}[A'(x, y) > \tau],$$

predicting *forgotten* when the score exceeds threshold  $\tau$ . Algorithm 2 provides the full details of the proposed attack.

**Relation to GLiR and unlearning specifics.** GLiR aggregates evidence across training steps by comparing per-step sample gradients to a Gaussian background of batch gradients; our adaptation replaces the (typically unavailable) per-step trajectory with the two-model contrast  $\Delta(x)$ . The geometry is unchanged: Evidence corresponds to the squared norm of the whitened difference,  $\|(\hat{\Sigma} + \lambda I)^{-1/2} \Delta(x)\|_2^2$ . Unlike standard MIAs that query a single model, the test exploits white-box access to  $\theta^{\text{org}}$  and  $\theta^u$  and targets the unlearning-specific alternative  $H_1$  (membership in both  $S$  and  $F$ ), providing a simple and powerful auditor for residual leakage after unlearning.

---

#### Algorithm 2 White-box Gaussian Gradient-Difference Attack for Unlearning Audit

---

**Require:** Pre-unlearning model  $\theta^{\text{org}}$ , post-unlearning model  $\theta^u$ , candidate sample  $(x, y)$ , loss  $\ell$ , predictor  $f(\cdot; \theta)$ , background sampler  $\mathcal{S}_{\text{test}}(m)$  that returns  $m$  i.i.d. draws from  $\mathcal{D}_{\text{test}}$

**Require:** Hyperparameters: background size  $m$ , repetitions  $T$ , ridge  $\lambda > 0$ , decision threshold  $\tau$

```

1:  $S \leftarrow 0$  ▷ initialize cumulative evidence
2: for  $t = 1$  to  $T$  do
3:    $B_t = \{(b_i, \tilde{y}_i)\}_{i=1}^m \leftarrow \mathcal{S}_{\text{test}}(m)$  ▷ if labels are unavailable, set  $\tilde{y}_i = \arg \max f(b_i; \theta^{\text{org}})$ 
4:   for  $i = 1$  to  $m$  do
5:      $\Delta_i \leftarrow \nabla_{\theta} \ell(f(b_i; \theta^u), \tilde{y}_i) - \nabla_{\theta} \ell(f(b_i; \theta^{\text{org}}), \tilde{y}_i) \in \mathbb{R}^d$ 
6:   end for
7:    $\hat{\mu}_t \leftarrow \frac{1}{m} \sum_{i=1}^m \Delta_i$ 
8:    $\hat{\Sigma}_t \leftarrow \frac{1}{m-1} \sum_{i=1}^m (\Delta_i - \hat{\mu}_t)(\Delta_i - \hat{\mu}_t)^{\top}$ 
9:    $\hat{\Sigma}_{t,\lambda} \leftarrow \hat{\Sigma}_t + \lambda I_d$  ▷ ridge for numerical stability
10:   $\Delta_x \leftarrow \nabla_{\theta} \ell(f(x; \theta^u), y) - \nabla_{\theta} \ell(f(x; \theta^{\text{org}}), y)$ 
11:   $v \leftarrow \Delta_x - \hat{\mu}_t$ 
12:  Solve  $\hat{\Sigma}_{t,\lambda} w = v$  for  $w$  (e.g., Cholesky);  $s_t \leftarrow v^{\top} w$ 
13:   $\ell_t \leftarrow -\log(1 - F_{\chi_d^2}(s_t))$  ▷ log tail  $p$ -value under  $H_0$ 
14:   $S \leftarrow S + \ell_t$ 
15: end for
16: return FORGOTTEN if  $S > \tau$ ; else TEST

```

---

## D ALTERNATIVE SYMMETRY: CHANGE-OF-BASIS NEURAL TELEPORTATION.

We also support the “neural teleportation” family of symmetry moves from Armenta et al. (2023). Let  $\tau_a > 0$  be a scale attached to neuron  $a$ . For an edge  $a \rightarrow b$  with weight  $\theta_{ab}$  the teleported weight is

$$\theta'_{ab} = \frac{\tau_b}{\tau_a} \theta_{ab}, \quad (10)$$

and if  $f_d$  is the activation at neuron  $d$  then the teleported activation is

$$g_d(x) = \tau_d f_d\left(\frac{x}{\tau_d}\right), \quad (11)$$

which preserves the function for positively homogeneous activations and extends naturally to batch-norm scales Armenta et al. (2023). In a subset of experiments, we choose  $\tau$  to further increase parameter dispersion under loss invariance (outputs unchanged), thereby weakening the differencing signal and making reconstruction harder; most results rely on the null space instantiation in equation 8. In the experimental section, it is explicitly indicated when both mechanisms are enabled.

## E BASELINES

We evaluate our teleportation-based defense as a *plug-and-play* module layered on top of several state-of-the-art approximate post-hoc unlearning methods. These baselines are representative of the most widely studied approaches in recent literature, requiring no access to training-time auxiliary statistics (e.g., per-sample gradients) and operating directly on a pretrained model. Specifically, we consider:

1. **NegGrad+ (NGP)** Kurmanji et al. (2023): An improved variant of GA that incorporates a regularization term on the retain-set. The method balances ascent on the *forget-set* with descent on the retain-set, aiming to preserve model utility while unlearning.
2. **SCRUB** Kurmanji et al. (2023): A knowledge distillation approach that aligns the unlearned model with the original model on the retain-set via a consistency loss, while simultaneously removing the *forget-set*’s influence. SCRUB represents one of the most competitive baselines in recent evaluations.
3. **SalUn** Fan et al. (2023): A saliency-based unlearning method that directs updates to a subset of weights deemed *salient* for forgetting, identified via gradient-based weight saliency maps. By restricting optimization to these salient weights, SalUn enhances stability and efficiency compared to updating the full parameter set, and aims to reduce the gap to exact retraining.
4. **Projected Gradient Unlearning (PGU)** Hoang et al. (2024): A method that projects the gradient ascent update for the *forget-set* onto a subspace orthogonal to retain-set, thereby mitigating catastrophic forgetting. PGU is particularly relevant as it addresses gradient-level entanglement between forget and retain data.
5. **BadTeacher (BT)** Chundawat et al. (2023a): A recent distillation-based unlearning method where the unlearned model (student) is trained against a deliberately corrupted teacher that provides noisy or adversarial labels for the *forget-set*, encouraging the student to erase their influence while preserving performance on the retain-set.
6. **SRF-ON (SF)** Huang et al. (2024): A geometry-aware unlearning method that decomposes updates into forget ascent, retain descent, and saliency modulation. By embedding updates into the manifold of retain data and approximating Hessian modulation with a fast–slow strategy, SRF-ON improves stability–plasticity trade-offs and enables efficient large-scale unlearning.

These methods span the main paradigms of approximate unlearning—gradient ascent, retain-aware regularization, distillation, and projection-based updates—making them representative state-of-the-art baselines.

Table 3: **Reconstruction on ImageNet-1K (ResNet-18), NGP (no defense)**. Averages over 100 forgotten samples. Higher is better for PSNR/SSIM; lower is better for LPIPS/MSE.

| Method                                 | PSNR (dB) $\uparrow$               | LPIPS (VGG) $\downarrow$            | LPIPS (Alex) $\downarrow$           | SSIM $\uparrow$                     | Test MSE $\downarrow$               | Feat MSE $\downarrow$               |
|----------------------------------------|------------------------------------|-------------------------------------|-------------------------------------|-------------------------------------|-------------------------------------|-------------------------------------|
| GIFD Fang et al. (2023)                | 8.28 $\pm$ 0.28                    | 0.630 $\pm$ 0.012                   | 0.448 $\pm$ 0.016                   | 0.098 $\pm$ 0.007                   | 0.174 $\pm$ 0.012                   | 6.725 $\pm$ 0.506                   |
| <b>Ours</b> (subspace-filtered + GIFD) | <b>10.74 <math>\pm</math> 0.31</b> | <b>0.564 <math>\pm</math> 0.013</b> | <b>0.345 <math>\pm</math> 0.015</b> | <b>0.117 <math>\pm</math> 0.008</b> | <b>0.100 <math>\pm</math> 0.007</b> | <b>5.388 <math>\pm</math> 0.497</b> |
| <b>Improvement (%)</b>                 | +29.7                              | +10.5                               | +22.9                               | +19.4                               | +42.5                               | +19.9                               |

## F ADDITIONAL WHITE-BOX RESULTS ON CIFAR-10

Figure 5 reports the complete ROC curves for the Gaussian gradient-diff test, covering the entire FPR range. These correspond to the same 640 unlearned models as in Figure 3, shown here without zoom to provide the full view.

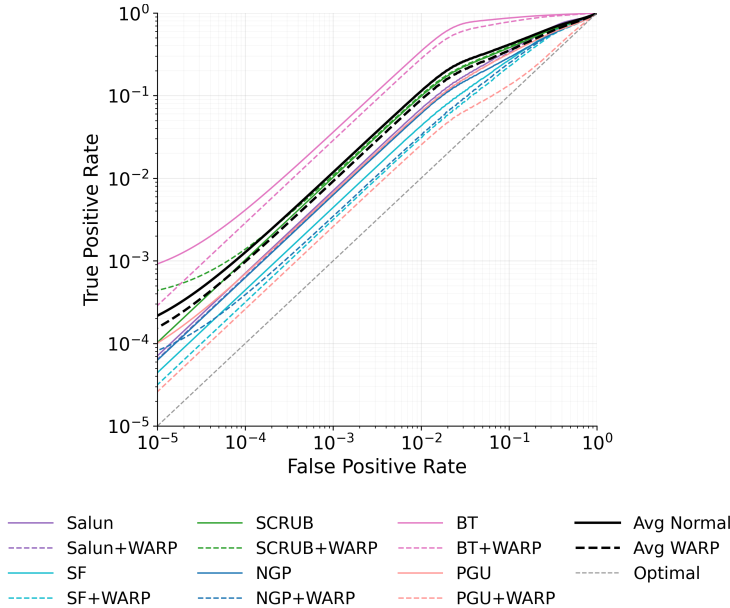

Figure 5: **Complete ROC curves for the white-box Gaussian gradient-diff test**. Averaged over 640 unlearned models, identical to Figure 3. Lower curves (closer to the random-guess diagonal) indicate stronger privacy.

## G RECONSTRUCTION ATTACK BASELINES AND COMPARISON.

Table 3 compares three strategies for unlearning: (i) *simple differencing*, directly inverting  $\Delta\theta$  Hu et al. (2024); Bertran et al. (2024); (ii) *generative inversion* (GIFD) Fang et al. (2023) applied to  $\Delta\theta$ ; and (iii) *Ours*, which adds *orthogonal subspace filtering* (Eq. equation 3) to a generative backbone. Results average 100 forgotten samples on ImageNet-1K with ResNet-18 under NGP unlearning.

## H ADDITIONAL RESULTS: ViT ON TINY-IMAGENET

To extend the white-box analysis of Section 4.3, we evaluate Vision Transformer models trained on Tiny-ImageNet. We adopt ViT-B/16 as the base architecture and follow the same setup described in Section 4, with the *forget-set* constructed by randomly sampling 1% of the training data and the *retain-set* consisting of the remainder. All models are trained with SGD and standard augmentations for ViT training. Unlearning is applied with NGP (NGP) and its teleported variant (NGP+WARP).

As shown in Table 4 and Figure 6, WARP substantially reduces attack success across all thresholds, with the largest relative gains at low false-positive rates where practical attacks operate. These results

Table 4: **White-box membership inference risk with and without teleportation (ViT, Tiny-ImageNet)**. Results are reported as mean  $\pm$  standard deviation across five splits. Improvements are computed as advantage reduction over random guessing.

| Method          | AUC                                 | TPR@0.01%                            | TPR@0.1%                             | TPR@1%                              | TPR@5%                              |
|-----------------|-------------------------------------|--------------------------------------|--------------------------------------|-------------------------------------|-------------------------------------|
| NGP (base)      | 0.792 $\pm$ 0.019                   | 0.0019 $\pm$ 0.001                   | 0.0188 $\pm$ 0.009                   | 0.178 $\pm$ 0.072                   | 0.444 $\pm$ 0.035                   |
| + WARP          | <b>0.755 <math>\pm</math> 0.019</b> | <b>0.0008 <math>\pm</math> 0.000</b> | <b>0.0079 <math>\pm</math> 0.003</b> | <b>0.075 <math>\pm</math> 0.027</b> | <b>0.302 <math>\pm</math> 0.054</b> |
| Improvement (%) | <b>12.7</b>                         | <b>61.1</b>                          | <b>61.2</b>                          | <b>61.2</b>                         | <b>36.1</b>                         |

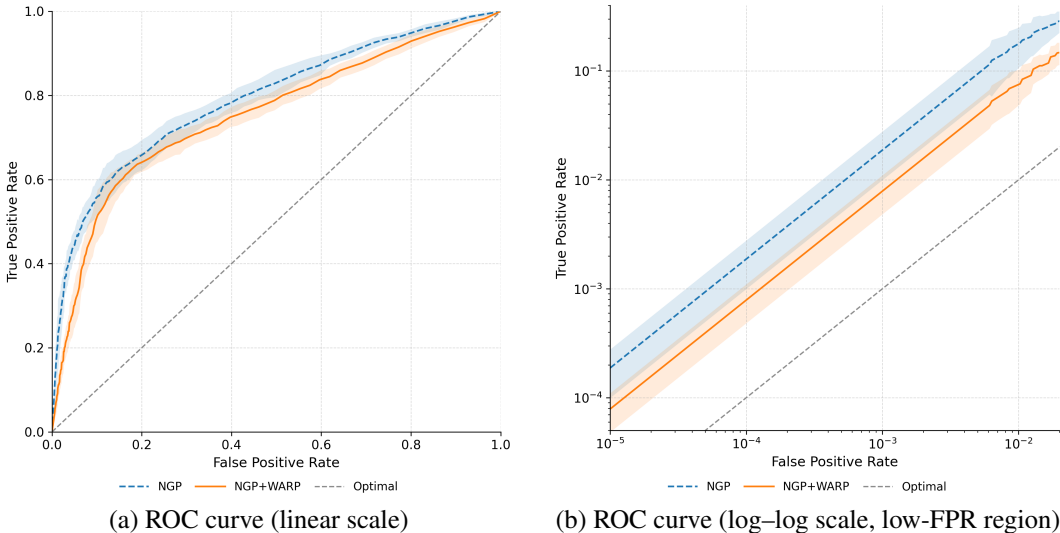

Figure 6: **White-box ROC for the Gaussian gradient-difference test on ViT-B/16 (Tiny-ImageNet)**. Each curve is averaged over five different forget-set splits, with shaded regions showing the standard deviation. Both figures compare NGP and NGP+WARP; (a) presents the full ROC on a linear axis, while (b) zooms into the low-FPR regime on log-log scale, which is the operational region for practical attacks.

confirm that the symmetry-based defense proposed in WARP extends effectively to transformer models, demonstrating applicability beyond convolutional architectures.

## I PRIVACY-UTILITY TRADE-OFF

Improving privacy in unlearning often comes at the cost of reduced model accuracy. Since test accuracy on the retain-set is one of the primary criteria for evaluating unlearning algorithms, it is critical to examine whether the proposed defense introduces unfavorable trade-offs.

We focus this analysis on NGP, as Figure 2 indicates that teleportation applied to NGP yields the most noticeable accuracy drop (roughly one percentage point), whereas for other methods accuracy remains stable or even improves. To probe this trade-off more carefully, we follow the hyperparameter tuning procedure described in Section 4 and select the top 20 trials with the highest validation score. From this pool we examine: (i) the single best-performing trial reported in Figure 2, (ii) the two trials with the highest validation accuracy, and (iii) the two trials with the lowest validation attack AUC.

Figure 7 plots test accuracy against privacy ( $1 - \text{AUC}$  of black-box MIA, higher is better) for NGP and NGP+WARP across the selected hyperparameter trials. The overall trade-off is clear: higher accuracy typically coincides with lower privacy. Yet teleportation consistently shifts the Pareto frontier upward, delivering strictly better privacy at nearly every accuracy level. While NGP saturates around privacy  $\approx 0.455$ , teleportation extends this frontier up to 0.484, breaking through the baseline ceiling. At the highest-accuracy setting, teleportation still provides a  $\sim 18\%$  reduction in attack advantage over random, demonstrating that even at stringent accuracy targets the defense yields nontrivial privacy

1080  
1081  
1082  
1083  
1084  
1085  
1086  
1087  
1088  
1089  
1090  
1091  
1092  
1093  
1094  
1095  
1096  
1097

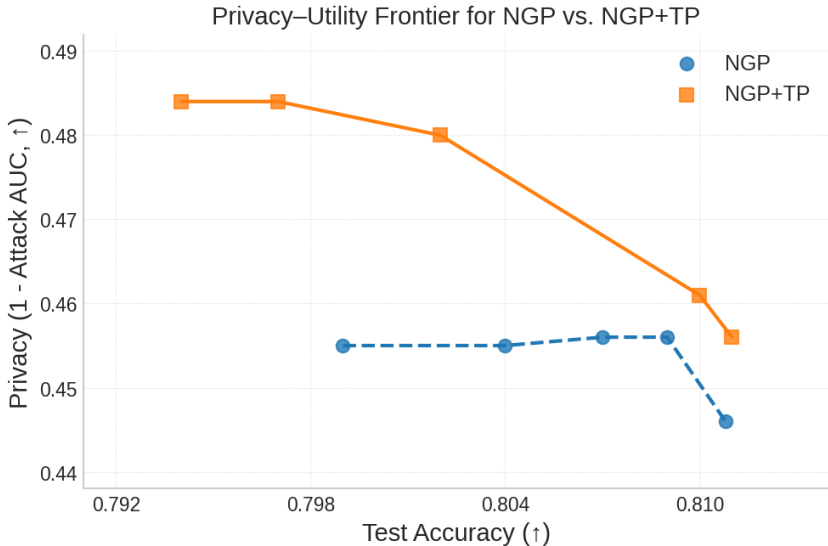

1098  
1099  
1100  
1101  
1102

Figure 7: **Privacy-utility trade-off for NGP with and without WARP.** Each point is a hyperparameter trial, with privacy (1-AUC) averaged over 640 shadow models (64 shadows × 10 forget sets) under the U-LiRA protocol. Points further to the right (higher accuracy) and upward (higher privacy) indicate better trade-offs.

1103  
1104  
1105  
1106  
1107  
1108  
1109  
1110  
1111  
1112  
1113  
1114  
1115  
1116  
1117  
1118  
1119  
1120  
1121

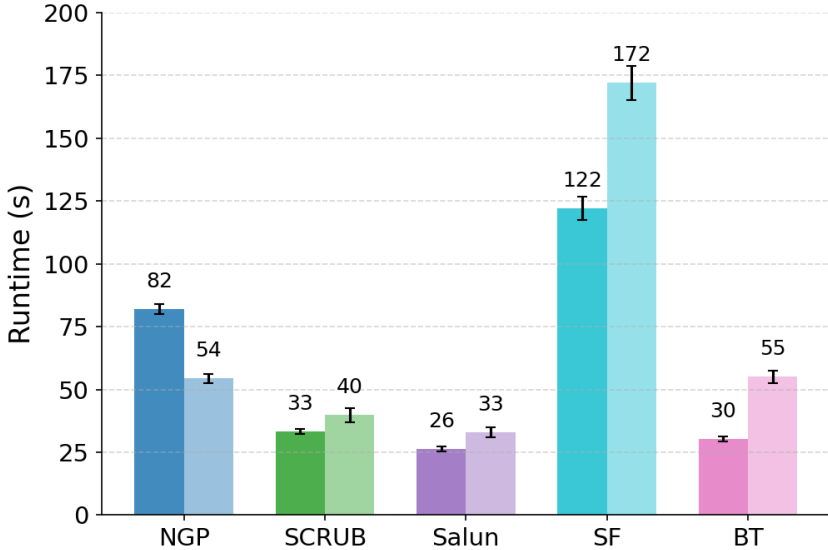

1122  
1123  
1124

Figure 8: **Runtime overhead of teleportation.** Average runtimes (seconds) of unlearning algorithms with and without the WARP plugin, evaluated on CIFAR-10 with ResNet-18. Each bar reports the mean over five runs, with error bars showing standard deviations.

1125  
1126  
1127  
1128

gains. Across the frontier, improvements remain stable, confirming that teleportation meaningfully reshapes the privacy-utility boundary in favor of the defender.

1129  
1130  
1131  
1132  
1133

## J RUNTIME ANALYSIS

In this appendix we focus on the retain-null-space instantiation of  $T_\phi$ , which is the only variant that requires explicit SVDs; the change-of-basis teleportation in Appendix D is SVD-free and without

its computational overhead as a result. Moreover, Section L introduces FastWARP, which replaces full SVD with randomized low-rank approximations and further reduces this overhead.

We benchmark the runtime of our teleportation defense across unlearning algorithms on a machine equipped with an NVIDIA GeForce RTX 4090 GPU (24 GB memory) and an Intel 13th Gen Core i9-13900KF CPU (24 cores, 32 threads, base 3.0 GHz, boost up to 5.8 GHz). Each experiment was repeated five times, and Figure 8 reports averages with standard deviations in the caption. All algorithms were run with the hyperparameters used in Table 1 and Figure 3, ensuring runtime reflects the same conditions as our privacy–utility evaluations.

~~On average~~For this particular SVD-based instantiation, teleportation increases runtime by approximately +27% relative to the baseline on average, reflecting the overhead of constructing the retain subspace. The main exception is NGP, where teleportation reduces runtime by about −32%, due to more stable updates that in turn lower the required number of unlearning epochs. Since subspace computation can be pre-computed offline and does not need to be repeated after every teleportation step, this overhead can be amortized in practice. ~~Approximations such as updating the subspace at intervals rather than per-step could further lower the cost, though runtime optimization is left for future work~~While updating the retain subspace less frequently can reduce cost, the primary computational overhead from full SVD is addressed directly by an approximate low-rank implementation (Appendix L), which removes the per-step bottleneck entirely.

## K TELEPORTATION-BASED UNLEARNING ALGORITHM

In Algorithm 3,  $T_\phi$  denotes an abstract symmetry operator; in our experiments we instantiate it either with retain–null-space teleportation or with change-of-basis teleportation, but any other loss-preserving symmetry could be used in its place.

---

**Algorithm 3** ~~Teleportation–Augmented Unlearning–WARP~~ (TAUretain–null-space instantiation): teleportation-augmented gradient-based unlearning.

---

**Require:**  $\theta^{\text{org}}, \mathcal{D}_f, \mathcal{D}_r, \ell_f, \ell_r, \lambda, \beta, \{\eta_t\}, \eta_{\text{tel}}, k, S$  or  $\tau_{\text{grad}}, \sigma^2, \varepsilon, T$

```

1:  $\theta_0 \leftarrow \theta^{\text{org}}$ 
2: for  $t = 0, \dots, T - 1$  do
3:   sample  $\mathcal{B}_f \subset \mathcal{D}_f, \mathcal{B}_r \subset \mathcal{D}_r$ 
4:    $\theta_{t+\frac{1}{2}} \leftarrow \theta_t - \eta_t (\nabla_{\theta} \ell_f(\theta_t | \mathcal{B}_f) + \lambda \nabla_{\theta} \ell_r(\theta_t | \mathcal{B}_r))$ 
5:   if  $(t \bmod S = 0) \vee \|\nabla_{\theta} \ell_f(\theta_{t+\frac{1}{2}} | \mathcal{B}_f)\|_2 > \tau_{\text{grad}}$  then
6:     for layer  $\ell$  do
7:       build  $R_\ell(\mathcal{B}_r)$ ;  $R_\ell = U_\ell \Sigma_\ell V_\ell^\top$  (SVD)
8:        $B_\ell \leftarrow U_{\ell,1:k}$ ;  $\Pi_\ell^\perp \leftarrow I - B_\ell B_\ell^\top$ 
9:     end for
10:     $\mathcal{L}_{\text{tel}}(\theta) = \frac{1}{2} \sum_{(x,y) \in \mathcal{B}_f} \|\nabla_{\theta} \ell(f(x; \theta), y)\|_2^2 - \frac{\beta}{2} \|\theta - \theta^{\text{org}}\|_2^2$ 
11:    for layer  $\ell$  do
12:       $W_\ell^{t+1} \leftarrow W_\ell^{t+\frac{1}{2}} - \eta_{\text{tel}} \Pi_\ell^\perp (\nabla_{W_\ell} \mathcal{L}_{\text{tel}}(\theta_{t+\frac{1}{2}})) + \sqrt{2\eta_{\text{tel}}\sigma^2} \varepsilon_{\ell,t}$ 
13:    end for
14:     $\theta_{t+1} \leftarrow \{W_\ell^{t+1}\}_\ell$ 
15:    if  $\ell_r(\theta_{t+1} | \mathcal{B}_r) > \ell_r(\theta_t | \mathcal{B}_r) + \varepsilon$  then
16:       $\theta_{t+1} \leftarrow \theta_{t+\frac{1}{2}}$ 
17:    end if
18:  else
19:     $\theta_{t+1} \leftarrow \theta_{t+\frac{1}{2}}$ 
20:  end if
21: end for
22: return  $\theta^u \leftarrow \theta_T$ 

```

$\varepsilon_{\ell,t} \sim \mathcal{N}(0, I)$

▷ backtrack/safeguard

---

## L APPROXIMATE NULL-SPACE TELEPORTATION

**Low-rank structure of retain representations.** For a retain minibatch  $\mathcal{B}_r$  and layer  $\ell$ , let  $R_\ell(\mathcal{D}_r) \in \mathbb{R}^{|\mathcal{B}_r| \times d_\ell}$  denote the matrix whose rows collect the layer- $\ell$  inputs  $\{\phi_\ell(x)\}_{x \in \mathcal{B}_r}$ . Empirically,  $R_\ell(\mathcal{D}_r)$  exhibits strong spectral decay: its spectrum is dominated by a small number of singular values, and most of the energy lies in a low-dimensional subspace. Such low-rank structure of activations, gradients and Hessians has been observed repeatedly in modern deep networks (Arora et al., 2019; Ghorbani et al., 2019; Fort et al., 2020; Gur-Ari et al., 2018), and is often attributed to overparameterisation and the implicit regularisation of SGD. In WARP, the retain subspace at layer  $\ell$  is defined by the top- $k$  left singular vectors of  $R_\ell(\mathcal{D}_r)$ :

$$R_\ell(\mathcal{D}_r) = U_\ell \Sigma_\ell V_\ell^\top, \quad B_\ell = U_{\ell,1:k}, \quad \Pi_\ell^\perp = I - B_\ell B_\ell^\top.$$

Since only the span of these dominant directions matters for teleportation, *exact* SVD is not required: any procedure that recovers a good approximation to the top- $k$  principal subspace suffices.

**Covariance-based PCA and subspace iteration.** Instead of computing a full thin SVD of  $R_\ell(\mathcal{D}_r)$ , FASTWARP estimates  $B_\ell$  via a covariance eigen-decomposition and a small number of subspace-iteration updates, following classical PCA and online PCA methods (Golub & Van Loan, 2013; Oja, 1982; Warmuth & Kuzmin, 2008; Mitliagkas et al., 2013). We first form the covariance

$$C_\ell = X_\ell X_\ell^\top \in \mathbb{R}^{d_\ell \times d_\ell},$$

where  $X_\ell \in \mathbb{R}^{d_\ell \times N}$  is a layer-wise input matrix constructed from  $\mathcal{B}_r$  (for convolutional layers we use unfolded patches; for batch-norm we aggregate per-channel features). We then compute the eigen-decomposition  $C_\ell = Q_\ell \Lambda_\ell Q_\ell^\top$  and retain the smallest  $k$  such that the cumulative explained variance exceeds a threshold  $\tau$ :

$$k = \min \left\{ j : \frac{\sum_{i=1}^j \max(\lambda_{\ell,i}, 0)}{\sum_{i=1}^{d_\ell} \max(\lambda_{\ell,i}, 0)} \geq \tau \right\}, \quad B_\ell = Q_{\ell,1:k},$$

optionally capped by a user-specified  $k_{\max}$ . For subsequent teleportation steps, we update  $B_\ell$  using a few iterations of subspace iteration (Golub & Van Loan, 2013; Halko et al., 2011; Musco & Musco, 2015; Tropp et al., 2017; Woodruff, 2014) :

$$Y \leftarrow C_\ell B_\ell, \quad [B_{\ell,-}] \leftarrow \text{qr}(Y),$$

which amounts to an Oja-style streaming PCA update (Oja, 1982) with QR re-orthogonalisation. This reduces the cost of updating  $B_\ell$  for a new minibatch from the  $\mathcal{O}(|\mathcal{B}_r| d_\ell^2)$  cost of a fresh thin SVD to  $\mathcal{O}(|\mathcal{B}_r| d_\ell k)$  for the covariance application plus  $\mathcal{O}(d_\ell k^2)$  for QR, with  $k \ll d_\ell$ . The resulting projector  $\Pi_\ell^\perp = I - B_\ell B_\ell^\top$  is then used exactly as in the original WARP update.

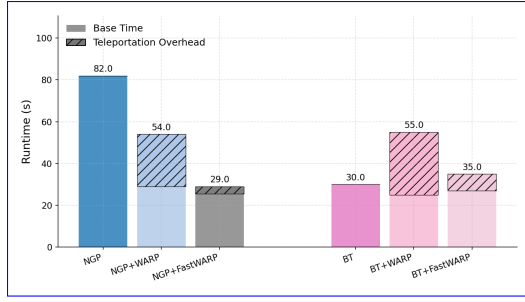

Figure 9: Runtime of the WARP plug-in on CIFAR-10 with ResNet-18. Each bar reports the mean over five runs. The top hatched segments correspond to the additional teleportation time; the solid base is the runtime of the underlying MU algorithm.

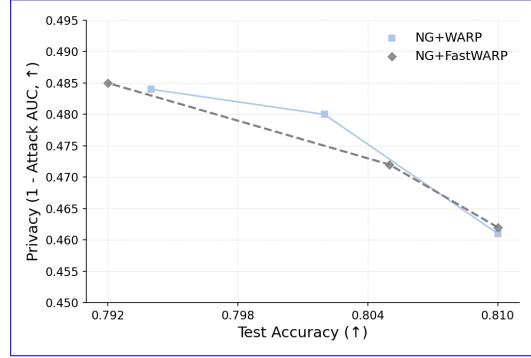

Figure 10: Privacy-utility comparison of NG+WARP and NG+FastWARP. The approximate teleportation method (FastWARP) matches the privacy-utility frontier of the exact variant, achieving nearly identical privacy and test accuracy.

#### Algorithm 4 FASTWARP basis update at layer $\ell$

**Require:**  $d_\ell$ , retain minibatch  $\mathcal{B}_\ell$ ,  $B_\ell^{\text{prev}}$  (or NONE),  $\tau \in (0, 1]$ ,  $k_{\max}$ ,  $T_{\text{track}}$

- 1: build  $X_\ell \in \mathbb{R}^{d_\ell \times N}$  from  $\mathcal{B}_\ell$
- 2:  $C_\ell \leftarrow X_\ell X_\ell^\top$ ;  $C_\ell \leftarrow \frac{1}{2}(C_\ell + C_\ell^\top)$
- 3: **if**  $B_\ell^{\text{prev}} = \text{NONE}$  **then**
- 4:  $C_\ell = Q_\ell \Lambda_\ell Q_\ell^\top$
- 5: sort  $\Lambda_\ell$  in descending order, permute  $Q_\ell$  accordingly
- 6:  $k \leftarrow \min \left\{ k_{\max}, \min \left\{ k : \frac{\sum_{i=1}^k \Lambda_{\ell,ii}}{\sum_{i=1}^k \Lambda_{\ell,ii} + \tau} \geq \tau \right\} \right\}$
- 7:  $B_\ell \leftarrow Q_\ell[:, 1:k]$
- 8: **else**
- 9:  $B_\ell \leftarrow B_\ell^{\text{prev}}$
- 10: **for**  $t = 1, \dots, T_{\text{track}}$  **do**
- 11:  $Y \leftarrow C_\ell B_\ell$
- 12:  $[B_\ell] \leftarrow \text{qr}(Y)$
- 13:  $B_\ell \leftarrow B_\ell[:, 1:k]$
- 14: **end for**
- 15: **end if**
- 16:  $\Pi_\ell^\perp \leftarrow I_{d_\ell} - B_\ell B_\ell^\top$
- 17: **return**  $B_\ell, \Pi_\ell^\perp$

**Runtime and privacy-utility impact.** Figure 9 reports the runtime for NG and BT with and without teleportation on CIFAR-10/ResNet-18. The hatched segments correspond to the teleportation component. Using full SVD yields a moderate yet visible overhead (e.g., BT+WARP increases runtime from 30s to 55s). Replacing full SVD with the covariance-based PCA and subspace iteration of Algorithm 4 (FASTWARP) shrinks this overhead substantially: total runtime drops to 29s and 35s for NG+FastWARP and BT+FastWARP, corresponding to a  $2\times$ – $3\times$  reduction in the teleportation time. The teleportation component becomes only a small fraction of the overall MU cost.

To measure the effect of this approximation on privacy and accuracy, Figure 10 compares NG+WARP and NG+FastWARP along the privacy-utility frontier. The two curves are nearly indistinguishable: privacy (1 – AUC) differs by at most 0.3–0.6% across operating points, and test accuracy changes by at most 0.2–0.3 percentage points. We also track retain-set loss during teleportation and observe that the relative drift under FASTWARP remains below 2%, indicating

that the approximate projector continues to enforce practical loss invariance. In some configurations, the additional numerical noise introduced by the approximation yields slightly *higher* privacy for the same utility. Overall, these results show that the privacy gains of WARP are robust to approximate PCA, and that FASTWARP preserves the empirical privacy–utility trade-off while significantly reducing computational overhead.

**Scalability to LLMs and calibration of the retain subspace.** A natural concern is whether null-space teleportation remains practical and stable at LLM scale, where layer widths reach  $d_\ell \sim 10^3\text{--}10^4$  and a single minibatch may not span the retain subspace. Empirically, recent compression work shows that truncated SVD and related low-rank factorizations are already applied efficiently to full LLM weight matrices with comparable or larger dimensions: SVD-LLM Wang et al. (2024; 2025b) optimizes singular-value truncation for LLaMA Touvron et al. (2023)- and GPT Brown et al. (2020)-class models while preserving perplexity and throughput, demonstrating that rank- $k$  SVD with  $k \ll d_\ell$  is tractable in practice on modern hardware. Complementary methods such as ResSVD Bai et al. (2025) leverage the residual matrix left by truncation to correct the approximation, further reducing the effective loss of expressivity at fixed rank. Orthogonal lines of work, e.g., weighted low-rank factorization for LMs, explicitly introduce data-dependent weights in the covariance (or Gram) operator to bias the recovered subspace toward high-importance tokens or examples, and report competitive compression ratios on transformer-based LMs Hsu et al. (2022); Sakr & Khailany (2024). In our setting, we can adopt the same design principles: instead of forming  $R_\ell(\mathcal{B}_r)$  from an arbitrary minibatch, we maintain a small buffer of retain batches with large gradient norm Sakr & Khailany (2024) or Fisher information, and construct the activation matrix  $X_\ell$  from this “high-influence” pool. This yields a weighted or importance-sampled covariance  $C_\ell = X_\ell X_\ell^\top$  whose top- $k$  eigenspace more faithfully captures the retain subspace seen over the full retain stream, while keeping the per-teleportation cost at  $\mathcal{O}(|\mathcal{B}_r|d_\ell k)$ . Combined with low-rank SVD implementations that are already optimized for LLM compression, these heuristics make the FastWARP projector construction compatible with large transformer architectures without breaking the retain loss invariance enforced by WARP. We leave the adaptation to large language models for future research. Our contributions target symmetry-based defenses for generic neural networks and established MU baselines, and do not address LLM-specific challenges in unlearning, which constitute a distinct line of investigation.

## M COMPARISON WITH DP–LANGEVIN NOISE DEFENCES

While our goal is to make neural networks more resilient to privacy attacks *post hoc*, a natural question is how WARP compares with defences based on differential privacy (DP). DP is the strongest known framework for providing indistinguishability guarantees between neighbouring datasets, and a small number of recent unlearning methods have attempted to translate these guarantees into *certified* machine unlearning. Among these, noisy-gradient (Langevin) approaches provide the closest analogue to our setting; we therefore include them as a comparison point.

Certified unlearning methods such as Guo et al. (2020); Chien et al. (2024b) formalise unlearning as an indistinguishability requirement between (i) a model obtained by training on the full dataset, and (ii) a counterfactual model that has never seen the forget set. These works build on the principle that if the training algorithm is itself DP, then suitable post-processing can yield certified removal of training points. Such guarantees make DP–Langevin the strongest known *general-purpose* defence with explicit indistinguishability guarantees, hence a meaningful baseline to evaluate privacy–utility trade-offs.

**What the DP guarantees actually require.** The formal guarantees in Guo et al. (2020); Chien et al. (2024b) rely on assumptions that do *not* hold in the deep, non-convex MU regime we consider:

1. **Convexity and strong dissipativity.** Both works require (strongly) convex,  $\ell_2$ -regularised objectives to bound the stationary distribution of the noisy dynamics. Deep convolutional networks trained with cross-entropy fundamentally violate these assumptions.

Table 5: **NGP+WARP vs. Langevin noise (U-LiRA, black-box)**. Reported are risks on *all forget samples* and on the *most-memorized* subset (top 5%), plus test accuracy. U-LiRA AUC and TPR@0.1% (FPR) are shown for each setting.

| Method                          | All samples (BB) |              | Most-memorized (top 5%) |              | Acc.         |
|---------------------------------|------------------|--------------|-------------------------|--------------|--------------|
|                                 | AUC              | TPR@0.1      | AUC                     | TPR@0.1      | Test         |
| Langevin ( $\varepsilon = 1$ )  | 0.523            | 0.004        | 0.671                   | 0.029        | 0.682        |
| Langevin ( $\varepsilon = 4$ )  | 0.571            | 0.006        | 0.766                   | 0.048        | 0.718        |
| Langevin ( $\varepsilon = 8$ )  | 0.627            | 0.020        | 0.912                   | 0.166        | 0.771        |
| Langevin ( $\varepsilon = 16$ ) | 0.650            | 0.027        | <b>0.935</b>            | 0.224        | <b>0.798</b> |
| NGP + WARP                      | <b>0.516</b>     | <b>0.003</b> | <b>0.598</b>            | <b>0.015</b> | 0.797        |

2. **DP-trained initial model required.** The certified-unlearning guarantee requires that the *original* model be obtained using *the same* noisy-gradient mechanism (noisy SGD or Langevin) applied throughout training on the full dataset. This is explicitly stated as a necessary condition in Chien et al. (2024b). In contrast, our setting begins from a standard ERM-trained model, which is non-DP and therefore outside the scope of their certification theorem.

As a result, the “ $\varepsilon$ ” obtained from the RDP accountant in our experiments should be interpreted purely as a calibrated *noise level*, not as a valid DP guarantee. Our use of Langevin noise is therefore a *strong noise-based defence*, not a certified mechanism.

**Adapting projected Langevin unlearning to MU.** Following Chien et al. (2024b), we implement projected Langevin dynamics on top of the same MU objective used throughout the paper. For a per-sample clipped gradient with radius  $C$  and loss

$$\mathcal{L}_{\text{MU}}(\theta) = \alpha (\ell_t(\theta) + \lambda \|\theta - \theta_p\|_2^2) - (1 - \alpha) \ell_f(\theta),$$

the DP-Langevin update is

$$g_t = \text{clip}(\nabla_{\theta} \mathcal{L}_{\text{MU}}(\theta_t), C), \tag{12}$$

$$\theta_{t+1} = \theta_t - \eta_t g_t + \sqrt{2 \eta_t \lambda} \xi_t, \quad \xi_t \sim \mathcal{N}(0, I), \tag{13}$$

where  $\lambda$  is the regularisation parameter entering the RDP privacy analysis. Given a target privacy level  $\varepsilon$ , we follow the exact Rényi-DP accounting of Chien et al. (2024b) to compute the Gaussian noise standard deviation  $\sigma$  required by their Langevin update. In our implementation, three quantities act as tunable hyperparameters: the learning rate  $\eta$ , the per-sample gradient-clipping radius  $C$ , and the regularisation coefficient  $\lambda$  that appears in the RDP analysis. For any chosen  $(\eta, C, \lambda)$  and target  $\varepsilon$ , the formulas of Chien et al. (2024b) uniquely determine the corresponding noise scale  $\sigma$ . To ensure fairness across baselines, we run the same number of hyperparameter-search trials as for the MU baselines, jointly sweeping  $(\eta, C, \lambda)$  to obtain the set of reported results in Table 5.

**Interpretation under non-convexity.** Although the privacy accountant yields a numerical  $\varepsilon$ , none of the formal conditions needed for DP-certified unlearning hold for our deep ResNet models. Consequently, we reiterate that the resulting values should not be interpreted as DP guarantees but rather as a systematic way of calibrating the magnitude of injected noise. The comparison therefore isolates the *empirical* effect of noise injection on forgetting, retention, and attack success.

**Empirical privacy-utility trade-off.** Table 5 reveals a clear tension between nominal DP guarantees and empirical membership privacy. As the target privacy budget for Langevin is relaxed from  $\varepsilon = 1$  to  $\varepsilon = 16$ , test accuracy gradually recovers (from 0.682 up to 0.798), but U-LiRA risk monotonically *increases*: the all-sample AUC rises from 0.523 to 0.650, and the AUC on the top-5% most memorised points grows from 0.671 to 0.935, with TPR@0.1% FPR increasing

from 0.029 to 0.224. In contrast, NGP+WARP simultaneously achieves competitive utility and strictly lower attack success: on all forget samples it attains the best AUC and TPR@0.1% (0.516 and 0.003), and on the most-memorised subset it reduces AUC to 0.598 and TPR@0.1% to 0.015, outperforming every Langevin configuration by a wide margin. Notably, relative to the lowest-noise setting ( $\epsilon = 16$ ), NGP+WARP matches accuracy (0.797 vs. 0.798) while cutting the memorised AUC from 0.935 to 0.598 and TPR@0.1% from 0.224 to 0.015. For stronger nominal privacy ( $\epsilon = 1$  or 4), Langevin noise severely degrades accuracy (down to 0.682) yet still leaves substantially higher attack AUC and TPR than WARP. Overall, these results suggest that isotropic DP noise is poorly aligned with the specific memorization patterns exploited by U-LiRA: it injects substantial randomness into all updates, harming utility without reliably protecting the most vulnerable examples, whereas WARP reshapes the parameter space in a targeted way that yields a markedly better empirical privacy-utility frontier.

Taken together, these observations clarify the roles of the two approaches. Langevin noise offers a principled mechanism for *certified* unlearning in the restricted setting of convex, DP-trained models, but its guarantees do not extend to the non-convex MU regime nor to pretrained models obtained without DP noise. Consequently, applying Langevin updates post hoc to deep networks provides no formal protection and yields an unfavourable privacy-utility trade-off in practice. By contrast, WARP operates directly on arbitrary pretrained models, targets the directions most responsible for memorization, and empirically achieves substantially stronger resistance to membership inference at comparable accuracy. A compelling direction for future work is to investigate whether the geometric structure exploited by WARP can be combined with, or serve as a foundation for, certified unlearning mechanisms that simultaneously handle non-convex objectives and non-DP initialisation—a capability not supported by current DP-Langevin frameworks.

## N ADAPTIVE RECONSTRUCTION WITH SYMMETRY-AWARE ATTACKER

Teleportation acts by composing the unlearning update with a symmetry transform that preserves predictions but redistributes parameter mass along loss-invariant directions (Section 3.2). This raises a natural question: can a stronger white-box adversary, aware of the teleportation family, *invert* or compensate for these symmetry moves and recover the residual forget gradient? More concretely, if the attacker can parameterise and optimize over the change-of-basis (COB) scales  $\tau$  used in neural teleportation (Armenta et al., 2023), does this restore reconstruction quality and defeat WARP?

It is worth noting that our privacy evaluation already includes two adaptive-attack families: U-LiRA and GLiR, both of which instantiate adaptive membership-inference attacks by optimising proxy models or surrogate loss landscapes. However, the reconstruction attack considered in Section 3.1—which directly targets instance-level recovery of the forgotten data—was *not* adaptive: the attacker optimized only over the dummy image while keeping the teleportation parameters fixed. To fully test the robustness of symmetry-based teleportation, we now consider a strictly stronger attacker that *jointly* optimizes both the dummy image and the teleportation parameters themselves.

Concretely, we study whether an attacker who can parameterise and optimize over the change-of-basis (COB) symmetry scales  $\tau$  used in neural teleportation (Armenta et al., 2023) can undo the defender’s symmetry moves, thereby restoring the clean gradient geometry required for successful reconstruction. This experiment directly probes whether teleportation is merely hiding the forget gradient behind a reversible reparameterisation, or whether it fundamentally reshapes the inverse problem faced by reconstruction attacks.

**Attack formulation.** In the adaptive setting, we give the attacker full knowledge of the teleportation family and let them *shadow* the defender’s operations. Specifically, starting from the original pretrained weights  $\theta_{\text{org}}$ , the attacker first applies a change-of-basis symmetry parametrised by COB scales  $\tau = \{\tau_a > 0\}$ , obtaining

$$\theta_{\text{org}}^{(\tau)} = T_{\tau}(\theta_{\text{org}}), \quad (14)$$

where  $T_{\tau}$  is the COB teleportation map (Appendix D). They then perform a single gradient step in parameter space using a dummy image-label pair  $(x, y)$ :

$$\theta^{(\tau)}(x, y) = \theta_{\text{org}}^{(\tau)} + \eta_{\text{att}} \nabla_{\theta} \ell(f(x; \theta_{\text{org}}^{(\tau)}), y), \quad (15)$$

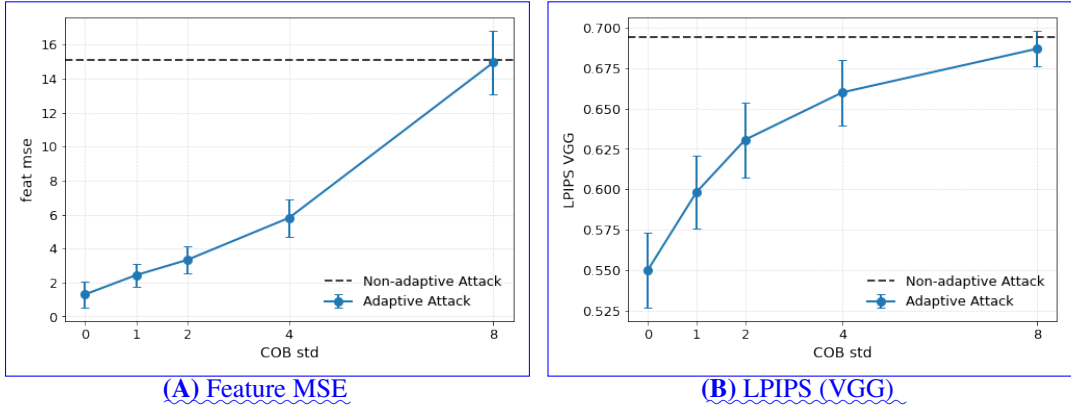

Figure 11: **Adaptive reconstruction under change-of-basis teleportation (NGP, ImageNet-1K).** (A) Feature MSE and (B) LPIPS (VGG) as a function of the COB standard deviation  $\sigma_{\text{cob}}$ . Increasing the symmetry variance consistently worsens reconstruction quality across both metrics.

with attack step size  $\eta_{\text{att}} > 0$ . The attacker’s goal is to choose  $(x, \tau)$  so that the shadowed update in equation 15 closely matches the actual unlearned parameters  $\theta_u$  produced by WARP. Formally, we solve

$$\hat{x}_f, \hat{\tau} \in \arg \min_{x, \tau} \left[ D(\theta^{(\tau)}(x, y), \theta_u) + \lambda_{\text{TV}} \text{TV}(x) + \lambda_{\tau} \Omega(\tau) \right], \quad (16)$$

where  $D(\cdot, \cdot)$  is a parameter-space discrepancy (we use  $\ell_2$  distance over all weights),  $\text{TV}(x)$  is the total-variation regulariser on the image, and  $\Omega(\tau)$  implements a Gaussian prior  $\tau_a \sim \mathcal{N}(1, \sigma_{\text{cob}}^2)$  on each COB scale. We optimize equation 16 by alternating gradient steps on  $x$  and  $\tau$ , with  $\tau$  clipped to a bounded interval around 1 to avoid degenerate scalings.

**Experimental setup.** For a fair comparison, we reuse exactly the reconstruction protocol of Section 4.4 (same model, dataset, forgotten examples, optimizer, and image priors), and only extend the attack to optimize over the COB parameters  $\tau$  via equation 16. We vary the COB prior variance  $\sigma_{\text{cob}}$  that defines  $\Omega(\tau)$ , treating each  $\tau_a$  as a scalar random variable centred at 1 with variance  $\sigma_{\text{cob}}$ . We sweep  $\sigma_{\text{cob}} \in \{0, 0.1, 0.2, 0.4, 0.8\}$ , where  $\sigma_{\text{cob}} = 0$  recovers the non-adaptive attack with fixed  $\tau \equiv 1$ , and larger values correspond to stronger dispersion along the symmetry orbit induced by WARP. Following the evaluation protocol of Table 2, we quantify reconstruction quality using PSNR, SSIM, LPIPS, and feature MSE, reporting averages over 30 randomly drawn forget examples.

**Results and connection to theory.** Figure 11 shows how reconstruction quality changes as we increase the COB prior std  $\sigma_{\text{cob}}$  that controls the spread of admissible symmetry scales. When  $\sigma_{\text{cob}} = 0$  the symmetry prior collapses around  $\tau_a \approx 1$ , so the attacker effectively searches over a narrow neighbourhood of the defender’s true teleportation and can partially recover the forgotten signal: the adaptive attack achieves substantially lower feature MSE and LPIPS than the non-adaptive WARP attack (dashed line). However, the attacker never observes the ground-truth COB scales used by the defender; as  $\sigma_{\text{cob}}$  grows and the symmetry orbit broadens, the optimisation over  $(x, \tau)$  quickly becomes unstable. Both metrics deteriorate almost monotonically with  $\sigma_{\text{cob}}$ : already at moderate variance the gains over the non-adaptive attack largely disappear, and for the largest tested  $\sigma_{\text{cob}}$  the adaptive reconstructions are statistically indistinguishable from (or slightly worse than) the non-adaptive baseline. Importantly, the COB standard deviation is a defender-controlled knob: in this symmetry family we can raise  $\sigma_{\text{cob}}$  up to 1.0 without changing the realised network function, and in our main reconstruction experiments in Table 2 we set  $\sigma_{\text{cob}} = 0.8$ , already placing the attacker in a high-variance regime where adaptive reconstruction is strongly impaired.

This trend is consistent with our theoretical analysis in Appendix O, which shows that the expected reconstruction error increases with the variance of the COB scales. Larger  $\sigma_{\text{cob}}$  expands the

1512 symmetry orbit of  $\theta_{\text{org}}$  and  $\theta_u$ , so the update  $\Delta\theta$  admits many symmetry-equivalent decompositions  
 1513 whose gradients are nearly orthogonal to the true forget gradient  $g_f$ . The optimisation problem  
 1514 in equation 16 thus becomes a highly ill-posed inverse problem over the joint space  $(x, \tau)$ , where  
 1515 many different configurations of  $(x, \tau)$  produce similar matches in parameter space. Empirically,  
 1516 the adaptive optimiser drifts toward such low-signal-to-noise solutions that satisfy the symmetry  
 1517 constraints but no longer encode the specific forgotten example, explaining the systematic  
 1518 degradation in reconstruction quality as symmetry variance (or std) increases.

1519  
 1520 **Takeaway.** Even under a strong white-box threat model—where the attacker knows  
 1521 the teleportation family and jointly adapts both the dummy input and the symmetry  
 1522 parameter—teleportation continues to disrupt reconstruction effectively. The injected symmetry  
 1523 components become entangled with the forget-induced update  $\Delta\theta$ , enlarging the attacker’s search  
 1524 space and destroying the geometric alignment between parameter differences and the underlying  
 1525 forgotten example. Thus, teleportation does not merely reparameterise the model in a way that  
 1526 can be inverted; instead, by injecting symmetry variance into the update, it structurally increases  
 1527 reconstruction error and removes the clean gradient-based signal that standard reconstruction attacks  
 1528 depend on. This provides empirical and theoretical evidence that symmetry-based teleportation  
 1529 fundamentally hardens the inverse problem faced by adaptive adversaries.

## 1530 O TELEPORTATION-AWARE INFORMATION-THEORETIC BOUNDS ON 1531 GRADIENT-BASED RECONSTRUCTION

### 1532 O.1 OVERVIEW OF THE THEORETICAL ANALYSIS

1533  
 1534 This appendix develops an information-theoretic lower bound on the minimal reconstruction  
 1535 mean-squared error (MSE) achievable by a gradient-based inversion adversary within a shared  
 1536 probabilistic model for gradients. We first adapt standard entropy-MSE relationships to the case  
 1537 where the attacker observes gradients rather than intermediate features, closely following the spirit  
 1538 of the analysis in Xia et al. Xia et al. (2025). We then introduce a Gaussian-mixture model (GMM)  
 1539 for gradient features and derive a parametric lower bound on the conditional entropy  $H(x|g)$ ,  
 1540 analogous to the intermediate-feature analysis in Xia et al. (2025) but specialized to gradients.  
 1541 Finally, we incorporate teleportation (change-of-basis) noise as private randomness in the training  
 1542 dynamics and analyze its impact on the *same* lower-bound pipeline, under an explicit diagonal  
 1543 approximation and an energy-preserving design assumption on the change-of-basis distribution.  
 1544 Throughout, we keep the modelling assumptions identical between the teleported and non-teleported  
 1545 channels, so any improvement we prove directly reflects a genuine tightening of the analytic lower  
 1546 bound on reconstruction error—and hence a provable gain in information-theoretic privacy *within*  
 1547 *this common generative framework*. We emphasize that  $H(x)$  is fixed by the dataset distribution, so  
 1548 only *relative* differences between the channels are meaningful.

### 1549 O.2 SETUP AND THREAT MODEL

1550  
 1551 **Data and model.** Let  $x \in \mathbb{R}^d$  denote the  $d$ -dimensional input random variable, distributed  
 1552 according to some unknown data distribution on a measurable subset  $\mathcal{X} \subset \mathbb{R}^d$ . We assume  
 1553 throughout that  $x$  admits a density w.r.t. Lebesgue measure and has finite second moment. (If  
 1554 one wishes to model discrete or manifold-supported data, the analysis can be recovered by adding  
 1555 an arbitrarily small Gaussian perturbation to  $x$  as is standard in differential-entropy arguments;  
 1556 we implicitly assume such smoothing has been applied so that conditional covariances below are  
 1557 positive definite.)

1558  
 1559 Consider a deep network with parameters  $W \in \mathbb{R}^{m \times d}$  and first-layer pre-activations

$$1560 \quad z = Wx \in \mathbb{R}^m,$$

1561  
 1562 and a subsequent decoder  $F_d$ . Let  $\ell(\cdot, y)$  be a loss for a label  $y$ , and define the gradient with respect  
 1563 to  $z$ :

$$1564 \quad g_z = \nabla_z \ell(F_d(z), y) \in \mathbb{R}^m.$$

In the analysis below, the attacker’s observation will be a gradient-based signal  $g$  (not necessarily equal to  $g_z$  directly) that is deterministically related to  $(x, y, W)$  plus noise. In a white-box setting, for instance, the adversary can observe weight differences across steps, which are affine functions of the underlying gradient features; since mutual information and our entropy-based bounds are invariant under fixed invertible affine reparametrizations, it is without loss of generality to work with a canonical gradient feature  $g$ .

**Adversarial objective.** An inversion adversary aims to reconstruct  $x$  from the observable  $g$ . Given an estimator  $\hat{x}(g)$ , we measure reconstruction quality by the mean-squared error (MSE)

$$\xi_g(\hat{x}) := \frac{1}{d} \mathbb{E}[\|x - \hat{x}(g)\|_2^2]. \quad (17)$$

The minimal MSE  $\xi_g$  is the infimum of equation 17 over all measurable estimators  $\hat{x}(\cdot)$ . We interpret “information-theoretic robustness” as the regime where the attacker is Bayes-optimal under the assumed generative model, i.e. has access to the true posterior  $P(x | g)$  induced by that model and implements the Minimum Mean Square Error (MMSE) estimator.

*Assumption 1* (Basic regularity). We assume:

- (i)  $x$  has a density on  $\mathbb{R}^d$  and finite second moment;
- (ii) for the observation  $g$ , the conditional distribution  $P(x | g)$  admits a density with finite second moment, and its covariance matrix  $\text{Cov}(x | g)$  is positive definite almost surely;
- (iii) all entropies, mutual informations and expectations used below are finite.

These conditions are standard in information-theoretic MMSE analysis (see, e.g., Xia et al. (2025)) and ensure that all quantities are well-defined and that the maximum-entropy characterization for Gaussians can be applied without degeneracy.

### O.3 MINIMAL MSE FROM GRADIENTS AND AN ENTROPY-BASED LOWER BOUND

**Bayes-optimal reconstruction from gradients** We first recall the standard MMSE characterization.

**Proposition 1** (Minimal reconstruction MSE from gradients). *Let  $x \in \mathbb{R}^d$  and an observation  $g$  satisfy Assumption 1. Consider estimators  $\hat{x}(g)$  of  $x$  based on  $g$  and define  $\xi_g(\hat{x})$  as in equation 17. Then:*

- (i) *The estimator that minimizes  $\xi_g(\hat{x})$  is the conditional mean  $\hat{x}^*(g) = \mathbb{E}[x | g]$ .*
- (ii) *The corresponding minimal MSE is*

$$\xi_g := \inf_{\hat{x}} \xi_g(\hat{x}) = \frac{1}{d} \mathbb{E}_g[\text{Tr}(\text{Cov}(x | g))], \quad (18)$$

where  $\text{Cov}(x | g)$  denotes the conditional covariance of  $x$  given  $g$  and  $\mathbb{E}_g$  is expectation w.r.t.  $g$ .

*Proof.* For any fixed  $g$ , the conditional risk  $\mathbb{E}[\|x - \hat{x}(g)\|_2^2 | g]$  is uniquely minimized by  $\hat{x}^*(g) = \mathbb{E}[x | g]$  (standard MMSE theory, cf. Xia et al. (2025)). The minimal conditional risk at  $g$  is

$$\mathbb{E}[\|x - \mathbb{E}[x | g]\|_2^2 | g] = \text{Tr}(\text{Cov}(x | g)),$$

since for any random vector  $X$  with mean  $\mu$  and covariance  $\Sigma$  one has  $\mathbb{E}\|X - \mu\|_2^2 = \text{Tr}(\Sigma)$ . Taking expectation over  $g$  and dividing by  $d$  yields equation 18.  $\square$

Thus, when we refer to the “minimal MSE achievable by an attacker” for a given observation model, we mean  $\xi_g$  as given in equation 18, corresponding to a Bayes-optimal adversary within that model.

**An entropy-based lower bound on the minimal MSE** We now relate the minimal MSE  $\xi_g$  to the conditional entropy  $H(x | g)$ , generalizing standard entropy–MMSE inequalities (cf. Xia et al. (2025)).

**Theorem 1** (Entropy-based lower bound on gradient reconstruction). *Under Assumption 1, let  $H(x | g)$  be the conditional differential entropy of  $x$  given the observation  $g$ . Then the minimal reconstruction MSE  $\xi_g$  in equation 18 satisfies*

$$\xi_g \geq \frac{1}{2\pi e} \exp\left(\frac{2}{d} H(x | g)\right). \quad (19)$$

*Proof.* Fix  $g$  and define  $\Sigma(g) := \text{Cov}(x | g)$ . Under Assumption 1,  $\Sigma(g)$  is symmetric and positive definite almost surely. For each such  $g$ , the conditional distribution of  $x$  given  $g$  has entropy bounded above by that of a Gaussian with the same covariance:

$$H(x | g = g) \leq \frac{1}{2} \log((2\pi e)^d \det(\Sigma(g))),$$

with equality iff  $x | g$  is Gaussian. This is the usual maximum entropy property of Gaussians. Taking expectation over  $g$  gives

$$H(x | g) = \mathbb{E}_g[H(x | g = g)] \leq \mathbb{E}_g\left[\frac{1}{2} \log((2\pi e)^d \det(\Sigma(g)))\right]. \quad (20)$$

Let  $\lambda_1(g), \dots, \lambda_d(g)$  be the eigenvalues of  $\Sigma(g)$  (all positive). Then

$$\det(\Sigma(g)) = \prod_{j=1}^d \lambda_j(g), \quad \text{Tr}(\Sigma(g)) = \sum_{j=1}^d \lambda_j(g).$$

By the Arithmetic Mean–Geometric Mean (AM–GM) inequality,

$$\prod_{j=1}^d \lambda_j(g) \leq \left(\frac{1}{d} \sum_{j=1}^d \lambda_j(g)\right)^d = \left(\frac{\text{Tr}(\Sigma(g))}{d}\right)^d,$$

so

$$\log \det(\Sigma(g)) \leq d \log\left(\frac{\text{Tr}(\Sigma(g))}{d}\right).$$

Substituting into equation 20,

$$H(x | g) \leq \mathbb{E}_g\left[\frac{1}{2} \log((2\pi e)^d \det(\Sigma(g)))\right] \leq \mathbb{E}_g\left[\frac{d}{2} \log\left(2\pi e \frac{\text{Tr}(\Sigma(g))}{d}\right)\right].$$

Since  $\log(\cdot)$  is concave, Jensen’s inequality yields

$$\mathbb{E}_g\left[\log\left(2\pi e \frac{\text{Tr}(\Sigma(g))}{d}\right)\right] \leq \log\left(2\pi e \frac{\mathbb{E}_g[\text{Tr}(\Sigma(g))]}{d}\right).$$

Therefore

$$H(x | g) \leq \frac{d}{2} \log\left(2\pi e \frac{\mathbb{E}_g[\text{Tr}(\Sigma(g))]}{d}\right). \quad (21)$$

By Proposition 1,  $\mathbb{E}_g[\text{Tr}(\Sigma(g))] = d\xi_g$ , so equation 21 becomes

$$H(x | g) \leq \frac{d}{2} \log(2\pi e \xi_g).$$

Rearranging,

$$\log(2\pi e \xi_g) \geq \frac{2}{d} H(x | g), \quad 2\pi e \xi_g \geq \exp\left(\frac{2}{d} H(x | g)\right),$$

which yields equation 19.  $\square$

Note that  $H(x)$ —and hence the absolute scale of these lower bounds—is fully determined by the underlying dataset distribution and does not depend on teleportation. In our comparisons between teleported and non-teleported channels,  $H(x)$  cancels and only *differences* or *ratios* matter.

#### O.4 A PARAMETRIC LOWER BOUND ON $H(x|g)$ VIA GAUSSIAN MIXTURES

We now introduce a specific probabilistic model for the gradient signal and derive a tractable parametric lower bound on  $H(x|g)$ . The modelling choices mirror those used for intermediate features in Xia et al. (2025), but here are applied to gradients.

##### O.4.1 GRADIENT FEATURE AND OBSERVATION MODEL

**Clean gradient feature.** Let  $G : \mathbb{R}^d \rightarrow \mathbb{R}^m$  be a deterministic mapping producing a *clean* gradient feature from input  $x$ . Specifically, let  $u = G(x) \in \mathbb{R}^m$  denote a feature derived deterministically from  $(x, y, W)$  (e.g., the gradient with respect to first-layer pre-activations, or a flattened stack of first-layer weight gradients). Thus  $u$  is a deterministic function of  $x$  once the model and label are fixed.

*Assumption 2* (Gaussian Mixture Model (GMM) for  $u$ ). We assume that the marginal distribution of  $u$  can be well approximated by a Gaussian mixture

$$u \sim \sum_{i=1}^K \pi_i \mathcal{N}(\mu_i, \Sigma_i), \quad \sum_{i=1}^K \pi_i = 1, \quad \pi_i > 0, \quad \Sigma_i \succ 0. \quad (22)$$

This GMM assumption is standard in information-theoretic analyses of representations Xia et al. (2025) and serves as our common surrogate model for gradient features.

**Noisy gradient observation.** We model the attacker’s baseline observation as a noisy version of  $u$ :

$$g_0 = u + \varepsilon, \quad \varepsilon \sim \mathcal{N}(0, \Sigma_g), \quad \varepsilon \perp (x, u), \quad (23)$$

where  $\Sigma_g \succ 0$  is a fixed positive-definite covariance matrix. This captures gradient perturbations due to stochastic training, subsampling, or other noise sources;  $\Sigma_g$  is assumed known to the attacker, as in Xia et al. (2025). We use this Gaussian channel as the standard abstraction of gradient perturbations for the subsequent information-theoretic analysis.

##### O.4.2 A MUTUAL-INFORMATION IDENTITY FOR DETERMINISTIC FEATURES

We will repeatedly use the following simple lemma for deterministic features.

**Lemma 1** (Mutual information for deterministic feature maps). *Let  $u = G(x)$  be a deterministic function of  $x$ , and let  $g$  be a random variable such that  $p(g|x, u) = p(g|u)$  (i.e.,  $g$  depends on  $(x, u)$  only through  $u$ ). Then*

$$I(x; g) = I(u; g).$$

Where  $I(x; g)$  denotes the mutual information between  $x$  and  $g$ .

*Proof.* Since  $u$  is a deterministic function of  $x$ , we have  $H(u|x) = 0$  and  $H(x, u) = H(x)$ . Moreover,  $p(g|x) = p(g|u)$  by the conditional-independence assumption, so

$$H(g|x) = \mathbb{E}_x H(g|x=x) = \mathbb{E}_x H(g|u=G(x)) = H(g|u).$$

Therefore

$$I(x; g) = H(g) - H(g|x) = H(g) - H(g|u) = I(u; g). \quad \square$$

We will apply this lemma to both the baseline channel  $g_0$  and the teleported channel  $g$  below.

### 1728 O.4.3 PARAMETRIC GMM-BASED LOWER BOUND ON $H(x | g_0)$

1729 We now adapt the mixture-entropy bound used in Xia et al. (2025) to gradients.

1730 **Theorem 2** (Parametric lower bound on  $H(x | g_0)$ ). *Under Assumption 1 and Assumption 2 and the*  
 1731 *channel equation 23, the conditional entropy  $H(x | g_0)$  satisfies*

$$1732 \underbrace{H(x | g_0) \geq H(x) - \sum_{i=1}^K \pi_i \left( -\log \pi_i + \frac{1}{2} \log \frac{|\Sigma_i + \Sigma_g|}{|\Sigma_g|} \right)}_{1733} \quad (24)$$

1734 *Proof.* Because  $u = G(x)$  is deterministic given  $x$ , and  $g_0$  depends on  $(x, u)$  only through  $u$   
 1735 via equation 23, we have  $g_0 \perp x | u$  and the conditions of Lemma 1 hold. Thus

$$1736 \underbrace{I(x; g_0) = I(u; g_0)}_{1737}$$

1738 and

$$1739 \underbrace{H(x | g_0) = H(x) - I(x; g_0) = H(x) - I(u; g_0)}_{1740}$$

1741 We bound  $I(u; g_0)$  from above using the GMM model. We have

$$1742 \underbrace{I(u; g_0) = H(g_0) - H(g_0 | u)}_{1743}$$

1744 From equation 23,  $g_0 | u \sim \mathcal{N}(u, \Sigma_g)$ , so

$$1745 \underbrace{H(g_0 | u) = \frac{1}{2} \log((2\pi e)^m |\Sigma_g|)}_{1746}$$

1747 Marginally,  $g_0$  is the convolution of the GMM  $u$  with the Gaussian  $\varepsilon$ , hence

$$1748 \underbrace{g_0 \sim \sum_{i=1}^K \pi_i \mathcal{N}(\mu_i, \Sigma_i + \Sigma_g)}_{1749}$$

1750 For any mixture density  $p(z) = \sum_i \pi_i p_i(z)$  with components  $p_i$ , the differential entropy satisfies  
 1751 the standard upper bound

$$1752 \underbrace{H(p) \leq H(\pi) + \sum_i \pi_i H(p_i)}_{1753}$$

1754 where  $H(\pi) = -\sum_i \pi_i \log \pi_i$  is the discrete entropy of the mixture weights (this follows by  
 1755 considering the joint entropy of the component index and the sample). Applying this with Gaussian  
 1756 components  $p_i = \mathcal{N}(\mu_i, \Sigma_i + \Sigma_g)$  yields

$$1757 \underbrace{H(g_0) \leq \sum_{i=1}^K \pi_i \left( -\log \pi_i + \frac{1}{2} \log((2\pi e)^m |\Sigma_i + \Sigma_g|) \right)}_{1758}$$

1759 as in Xia et al. (2025). Therefore

$$\begin{aligned} 1760 \underbrace{I(u; g_0)}_{1761} &\leq \sum_{i=1}^K \pi_i \left( -\log \pi_i + \frac{1}{2} \log((2\pi e)^m |\Sigma_i + \Sigma_g|) \right) - \frac{1}{2} \log((2\pi e)^m |\Sigma_g|) \\ 1762 &= \sum_{i=1}^K \pi_i \left( -\log \pi_i + \frac{1}{2} \log((2\pi e)^m |\Sigma_i + \Sigma_g|) \right) + \sum_{i=1}^K \pi_i \left( -\frac{1}{2} \log((2\pi e)^m |\Sigma_g|) \right) \\ 1763 &= \sum_{i=1}^K \pi_i \left( -\log \pi_i + \frac{1}{2} \log((2\pi e)^m |\Sigma_i + \Sigma_g|) - \frac{1}{2} \log((2\pi e)^m |\Sigma_g|) \right) \\ 1764 &= \sum_{i=1}^K \pi_i \left( -\log \pi_i + \frac{1}{2} \log \frac{|\Sigma_i + \Sigma_g|}{|\Sigma_g|} \right). \end{aligned}$$

where the  $(2\pi e)^m$  terms cancel. Substituting into  $H(x | g_0) = H(x) - I(u; g_0)$  yields equation 24.  $\square$

Theorem 2 yields a parametric lower bound on  $H(x | g_0)$ —parametric in the GMM and noise covariances. Via Theorem 1, this in turn induces a lower bound on the minimal reconstruction MSE for an attacker observing  $g_0$ . Our teleportation analysis will reuse exactly the same ingredients (GMM approximation and mixture-entropy bound) so comparisons are on equal footing.

## O.5 TELEPORTATION / CHANGE-OF-BASIS NOISE ON GRADIENTS

We now incorporate teleportation (change-of-basis; CoB) symmetry as a source of private randomness in the gradient dynamics and analyze its impact on the *same* lower-bound pipeline used for  $g_0$ .

### O.5.1 TELEPORTATION AS PRIVATE MULTIPLICATIVE NOISE

**Teleportation structure.** For each layer  $\ell$ , let  $\tau^{[\ell]}$  denote the corresponding CoB vector (with all entries nonzero). The teleported gradient at layer  $\ell$  is obtained by column-scaling with  $\tau^{[\ell-1]}$  and row-scaling with  $1/\tau^{[\ell]}$ , i.e.

$$dV^{[\ell]} = \tau^{[\ell-1]} \bullet dW^{[\ell]} \bullet (1/\tau^{[\ell]}),$$

$$dV_{ij}^{[\ell]} = \tau_j^{[\ell-1]} dW_{ij}^{[\ell]} (1/\tau_i^{[\ell]}),$$

where the left operation multiplies each column of  $dW^{[\ell]}$  by the corresponding coordinate of  $\tau^{[\ell-1]}$ , and the right operation multiplies each row by the corresponding coordinate of  $1/\tau^{[\ell]}$ . Consequently, each gradient entry acquires a multiplicative factor equal to a ratio of CoB coordinates. As such, each gradient entry picks up a multiplicative factor equal to a ratio of CoB entries. Flattening all gradient parameters into a single vector, we write the clean gradient feature as  $u$  and its teleported version as

$$\tilde{u} = R(\tau) u, \quad (25)$$

where  $R(\tau)$  is a diagonal matrix with entries  $r_j(\tau) = \tau_{b(j)}/\tau_{a(j)}$  corresponding to the appropriate input/output channels  $(a(j), b(j))$  of coordinate  $j$ . In practice, these ratios are constrained by the underlying channel-wise  $\tau^{[\ell]}$  structure; our analysis below treats  $\{r_j(\tau)\}$  as effective per-coordinate scalings induced by that structure.

**Threat model for teleportation.** We adopt the following threat model.

*Assumption 3* (Teleportation threat model).

- (i) The CoB parameters  $\tau$  are sampled from a distribution  $P_\tau$  that is independent of  $(x, u)$ .
- (ii) Teleportation is applied internally in the training update rule, so that the observable gradient feature (e.g., weight differences across a step) is a function of  $\tilde{u}$  rather than  $u$ . Algebraically, this yields an observation of the form equation 26 below.
- (iii) The adversary has white-box access to the model architecture and weights but *does not* observe  $\tau$  directly. They know the distribution  $P_\tau$ .

Under Assumption 3, the teleported observation channel is

$$g = \tilde{u} + \varepsilon = R(\tau) u + \varepsilon, \quad \varepsilon \sim \mathcal{N}(0, \Sigma_g), \quad \varepsilon \perp (x, u, \tau). \quad (26)$$

This is the same additive-noise form as in equation 23, applied to a multiplicatively perturbed feature  $R(\tau)u$ .

### O.5.2 TELEPORTATION-AWARE ENTROPY LOWER BOUND

We now derive the teleportation-aware counterpart of Theorem 2, using the same GMM approximation for  $u$ . Here the relevant mutual-information identity is again supplied by Lemma 1.

**Theorem 3** (Teleportation-aware lower bound on  $H(x | g)$ ). *Under Assumption 1, Assumption 2, Assumption 3 and the teleported channel equation 26, the conditional entropy  $H(x | g)$  satisfies*

$$H(x | g) \geq H(x) - \sum_{i=1}^K \pi_i \left( -\log \pi_i + \frac{1}{2} \mathbb{E}_\tau \log \frac{|R(\tau)\Sigma_i R(\tau)^\top + \Sigma_g|}{|\Sigma_g|} \right), \quad (27)$$

where the expectation is taken w.r.t.  $\tau \sim P_\tau$ .

*Proof.* As before,  $u = G(x)$  is deterministic given  $x$ , and  $g$  depends on  $(x, u)$  only through  $(u, \tau)$  via equation 26. In particular, we have the Markov chain

$$x \rightarrow u \rightarrow (g, \tau) \rightarrow g,$$

and  $g \perp x | (u, \tau)$ . Integrating over the independent  $\tau$  yields  $p(g | x, u) = p(g | u)$ , and hence the conditions of Lemma 1 hold, giving

$$I(x; g) = I(u; g), \quad H(x | g) = H(x) - I(x; g) = H(x) - I(u; g).$$

We bound  $I(u; g)$  from above. By the chain rule and independence of  $u$  and  $\tau$ ,

$$I(u; g) = I(u; g, \tau) - I(u; \tau | g) = I(u; g | \tau) - I(u; \tau | g) \leq I(u; g | \tau),$$

since  $I(u; \tau | g) \geq 0$ . Here  $I(u; g | \tau)$  is conditional mutual information and can be written as

$$I(u; g | \tau) = \mathbb{E}_\tau [I(u; g | \tau = t)].$$

For a fixed realization  $\tau = t$ , the channel is linear with Gaussian noise:

$$g | \tau = t = R(t)u + \varepsilon.$$

Conditionally on mixture component  $i$ ,  $u | i \sim \mathcal{N}(\mu_i, \Sigma_i)$ , so

$$g | (i, \tau = t) \sim \mathcal{N}(R(t)\mu_i, R(t)\Sigma_i R(t)^\top + \Sigma_g),$$

and  $g | \tau = t$  is a GMM with components indexed by  $i$ . For this fixed  $t$ ,

$$I(u; g | \tau = t) = H(g | \tau = t) - H(g | u, \tau = t).$$

Since  $g | (u, \tau = t) \sim \mathcal{N}(R(t)u, \Sigma_g)$ , we obtain

$$H(g | u, \tau = t) = \frac{1}{2} \log((2\pi e)^m |\Sigma_g|).$$

Using the same mixture-entropy bound as before, applied to the GMM  $g | \tau = t$ , we have

$$H(g | \tau = t) \leq \sum_{i=1}^K \pi_i \left( -\log \pi_i + \frac{1}{2} \log((2\pi e)^m |R(t)\Sigma_i R(t)^\top + \Sigma_g|) \right).$$

Therefore

$$\begin{aligned} I(u; g | \tau = t) &\leq \sum_{i=1}^K \pi_i \left( -\log \pi_i + \frac{1}{2} \log((2\pi e)^m |R(t)\Sigma_i R(t)^\top + \Sigma_g|) \right) - \frac{1}{2} \log((2\pi e)^m |\Sigma_g|) \\ &= \sum_{i=1}^K \pi_i \left( -\log \pi_i + \frac{1}{2} \log \frac{|R(t)\Sigma_i R(t)^\top + \Sigma_g|}{|\Sigma_g|} \right). \end{aligned}$$

Taking expectation over  $\tau$  yields

$$I(u; g | \tau) = \mathbb{E}_\tau I(u; g | \tau = t) \leq \sum_{i=1}^K \pi_i \left( -\log \pi_i + \frac{1}{2} \mathbb{E}_\tau \log \frac{|R(\tau)\Sigma_i R(\tau)^\top + \Sigma_g|}{|\Sigma_g|} \right).$$

Combining  $I(u; g) \leq I(u; g | \tau)$  with  $H(x | g) = H(x) - I(u; g)$  gives equation 27.  $\square$

Theorem 3 is the teleportation analogue of Theorem 2, obtained via the same steps, with  $\Sigma_i$  replaced by  $R(\tau)\Sigma_i R(\tau)^\top$  and an additional expectation over  $\tau$ .

## 1890 O.6 DIAGONAL APPROXIMATION AND THE ROLE OF THE COB DISTRIBUTION

1891  
1892 To make the teleportation effect more interpretable at a per-coordinate level, we now adopt a  
1893 diagonal approximation. This is a modelling simplification, similar in spirit to Xia et al. (2025), and  
1894 all comparisons between teleported and baseline channels will be made *within* this shared surrogate  
1895 approximation.

### 1896 O.6.1 DIAGONAL APPROXIMATION

1897  
1898 *Assumption 4* (Diagonal covariance approximation). We work in the canonical channel basis in  
1899 which teleportation is defined and posit that, in this basis,

$$1900 \Sigma_i = \text{diag}(\sigma_{i,1}^2, \dots, \sigma_{i,m}^2), \quad \Sigma_g = \text{diag}(\gamma_1^2, \dots, \gamma_m^2),$$

1901  
1902 and the teleportation matrix has the form

$$1903 R(\tau) = \text{diag}(r_1(\tau), \dots, r_m(\tau)).$$

1904  
1905  
1906 That is, we adopt a surrogate model in which gradient covariance, observation noise and CoB  
1907 factors act coordinatewise in the natural channel basis, rather than attempting to diagonalize arbitrary  
1908 covariances and then reinterpret teleportation in that rotated frame. This is not claimed to be an exact  
1909 description of real networks, but a structured approximation for per-coordinate interpretation.

1910 Under Assumption 4,

$$1911 R(\tau)\Sigma_i R(\tau)^\top + \Sigma_g = \text{diag}(\gamma_1^2 + r_1(\tau)^2 \sigma_{i,1}^2, \dots, \gamma_m^2 + r_m(\tau)^2 \sigma_{i,m}^2),$$

1912  
1913 and hence

$$1914 \frac{|R(\tau)\Sigma_i R(\tau)^\top + \Sigma_g|}{|\Sigma_g|} = \prod_{j=1}^m \left(1 + \alpha_{i,j} r_j(\tau)^2\right), \quad \alpha_{i,j} := \frac{\sigma_{i,j}^2}{\gamma_j^2}. \quad (28)$$

1915  
1916 Taking logs and expectation in equation 27, we obtain

$$1917 \mathbb{E}_\tau \log \frac{|R(\tau)\Sigma_i R(\tau)^\top + \Sigma_g|}{|\Sigma_g|} = \sum_{j=1}^m \psi_{i,j},$$

1918  
1919 where we define the per-coordinate quantities

$$1920 \psi_{i,j} := \mathbb{E}_\tau [\log(1 + \alpha_{i,j} r_j(\tau)^2)]. \quad (29)$$

1921  
1922 Thus Theorem 3 becomes, under Assumption 4,

$$1923 H(x | g) \geq H(x) - \sum_{i=1}^K \pi_i \left( -\log \pi_i + \frac{1}{2} \sum_{j=1}^m \psi_{i,j} \right). \quad (30)$$

### 1924 O.6.2 BASELINE (NON-TELEPORTED) DIAGONAL BOUND

1925  
1926 For comparison, if no teleportation is applied, we have  $R(\tau) \equiv I$  and  $r_j(\tau)^2 \equiv 1$ . Under the same  
1927 diagonal surrogate,

$$1928 \frac{|\Sigma_i + \Sigma_g|}{|\Sigma_g|} = \prod_{j=1}^m (1 + \alpha_{i,j}),$$

1929  
1930 and the GMM-based entropy lower bound equation 24 reduces to

$$1931 H(x | g_0) \geq H_0^{\text{lb}} := H(x) - \sum_{i=1}^K \pi_i \left( -\log \pi_i + \frac{1}{2} \sum_{j=1}^m \log(1 + \alpha_{i,j}) \right). \quad (31)$$

We explicitly introduce  $H_0^{\text{lb}}$  to denote the analytic lower bound on  $H(x | g_0)$  obtained under the GMM and diagonal surrogate.

Similarly, in the teleported diagonal setting equation 30 we define

$$H(x | g) \geq H_{\text{tele}}^{\text{lb}} := H(x) - \sum_{i=1}^K \pi_i \left( -\log \pi_i + \frac{1}{2} \sum_{j=1}^m \psi_{i,j} \right). \quad (32)$$

Both  $H_0^{\text{lb}}$  and  $H_{\text{tele}}^{\text{lb}}$  are computed from exactly the same modelling ingredients and diagonal surrogate.

### O.6.3 ENERGY-PRESERVING COB AND IMPROVEMENT OF THE BOUND

To isolate teleportation as a pure source of *randomization* (rather than a trivial global rescaling of gradient energy), we consider energy-preserving CoB distributions at the level of the per-coordinate effective ratios.

**Assumption 5** (Energy-preserving CoB marginals). For each coordinate  $j$ , the marginal distribution of  $r_j(\tau)^2$  satisfies  $\mathbb{E}_\tau[r_j(\tau)^2] = 1$ .

This condition enforces that, on average, teleportation does not inflate or shrink per-coordinate gradient energy; it only redistributes it stochastically. In practice, the defender controls the sampling of  $\tau$  and hence the induced distribution of ratios  $\{r_j(\tau)\}$ , subject to architectural constraints (shared channels, etc.). We do not model those constraints explicitly here; we treat  $\{r_j(\tau)\}$  as effective per-coordinate scalings whose marginals can be chosen to satisfy Assumption 5.

We do not assume independence of  $r_j(\tau)$  across  $j$ , only these marginals.

Define, for each  $(i, j)$ ,

$$\Delta\psi_{i,j} := \log(1 + \alpha_{i,j}) - \psi_{i,j} = \log(1 + \alpha_{i,j}) - \mathbb{E}_\tau[\log(1 + \alpha_{i,j} r_j(\tau)^2)]. \quad (33)$$

Subtracting equation 31 from equation 32 yields an exact relation between the two analytic entropy lower bounds under the diagonal surrogate.

**Corollary 1** (Exact relation between diagonal entropy lower bounds). Under Assumption 4, the diagonal entropy lower bounds equation 31–equation 32 satisfy

$$H_{\text{tele}}^{\text{lb}} = H_0^{\text{lb}} + \frac{1}{2} \sum_{i=1}^K \pi_i \sum_{j=1}^m \Delta\psi_{i,j}, \quad (34)$$

with  $\Delta\psi_{i,j}$  defined in equation 33. If, in addition, Assumption 5 holds, then each  $\Delta\psi_{i,j}$  is non-negative, and hence

$$H_{\text{tele}}^{\text{lb}} \geq H_0^{\text{lb}}. \quad (35)$$

*Proof.* Equation 34 is obtained by direct subtraction of equation 31 from equation 32 and using equation 33. For the sign of  $\Delta\psi_{i,j}$ , fix  $\alpha > 0$  and define  $\phi_\alpha(t) := \log(1 + \alpha t)$ , which is concave on  $t > 0$ . Under Assumption 5,

$$\psi_{i,j} = \mathbb{E}_\tau[\phi_{\alpha_{i,j}}(r_j(\tau)^2)] \leq \phi_{\alpha_{i,j}}(\mathbb{E}_\tau[r_j(\tau)^2]) = \phi_{\alpha_{i,j}}(1) = \log(1 + \alpha_{i,j}),$$

so  $\Delta\psi_{i,j} \geq 0$  for all  $(i, j)$ , implying equation 35.  $\square$

**Remark 1** (Scope and strength of the entropy result). Within the shared modelling assumptions (GMM, diagonal surrogate, energy-preserving CoB), Corollary 1 shows that teleportation *never decreases* the analytic entropy lower bound:

$$H(x | g_0) \geq H_0^{\text{lb}}, \quad H(x | g) \geq H_{\text{tele}}^{\text{lb}} \geq H_0^{\text{lb}}.$$

We stress that we do *not* claim  $H(x | g) \geq H(x | g_0)$  for the true channels. Rather, we compare the surrogate quantities  $H_0^{\text{lb}}$  and  $H_{\text{tele}}^{\text{lb}}$  arising under the same generative model; under this common lens, teleportation strictly improves the analytic lower bound on uncertainty about  $x$ .

## O.7 TELEPORTATION-AWARE RECONSTRUCTION LOWER BOUND

We now translate the entropy bounds into reconstruction MSE lower bounds using Theorem 1.

### O.7.1 BASELINE AND TELEPORTED MSE LOWER BOUNDS

From equation 31–equation 32 and Theorem 1, we obtain analytic lower bounds on the minimal reconstruction MSE for the baseline and teleported channels:

$$\underline{\xi}_0 := \frac{1}{2\pi e} \exp\left(\frac{2}{d} H_0^{\text{lb}}\right), \quad (36)$$

$$\underline{\xi}_{\text{tele}} := \frac{1}{2\pi e} \exp\left(\frac{2}{d} H_{\text{tele}}^{\text{lb}}\right). \quad (37)$$

By construction and monotonicity of the exponential,

$$\xi_{g_0} \geq \underline{\xi}_0, \quad \xi_g \geq \underline{\xi}_{\text{tele}}, \quad (38)$$

where  $\xi_{g_0}$  and  $\xi_g$  are the true minimal MSEs for the baseline and teleported channels, respectively. Again,  $H(x)$  is common to both channels and cancels in all *relative* statements about  $\xi_{\text{tele}}/\xi_0$ .

### O.7.2 IMPROVEMENT FACTOR ON THE ANALYTIC MSE BOUND

Combining the definitions, the ratio between the teleported and baseline MSE *lower bounds* satisfies

$$\frac{\underline{\xi}_{\text{tele}}}{\underline{\xi}_0} = \exp\left(\frac{2}{d}(H_{\text{tele}}^{\text{lb}} - H_0^{\text{lb}})\right) = \exp\left(\frac{1}{d} \sum_{i=1}^K \pi_i \sum_{j=1}^m \Delta\psi_{i,j}\right), \quad (39)$$

with  $\Delta\psi_{i,j}$  as in equation 33.

Under the energy-preserving assumption (Assumption 5),  $\Delta\psi_{i,j} \geq 0$ , hence the exponential factor in equation 39 is at least 1, and the analytic teleportation-aware MSE lower bound is never smaller than the baseline one. In other words, teleportation provably raises the information-theoretic floor on reconstruction accuracy *as captured by this shared surrogate model*. We do not assert any ordering between the true minimal MSEs  $\xi_{g_0}$  and  $\xi_g$ .

*Remark 2* (Interpretation for privacy). Equation 39 provides a quantitative, distribution-aware guarantee: under the shared assumptions (GMM, diagonal surrogate, energy-preserving CoB), teleportation inflates the analytic lower bound on the attacker’s reconstruction MSE by a factor given by the RHS of equation 39. This factor depends on the CoB distribution only through  $\Delta\psi_{i,j}$ , which in turn are functions of the per-coordinate signal-to-noise ratios  $\alpha_{i,j}$  and the marginals of  $r_j(\tau)^2$ . Thus teleportation is not merely a heuristic perturbation: for any attacker whose behaviour is dominated by this generative model (in essentially the same sense as in Xia et al. (2025)), there is a formal lower bound on how accurately they can reconstruct  $x$ .

## O.8 LOG-NORMAL COB FAMILY (EFFECTIVE MODEL)

We now specialize the general diagonal analysis to an effective log-normal model for the CoB-induced per-coordinate scalings  $r_j(\tau)^2$ , to make the dependence on CoB variance explicit in the analytic MSE lower bounds.

**Log-normal marginal model.** We model each per-coordinate scaling as

$$r_j(\tau)^2 = \exp(Y_j),$$

where

$$Y_j \sim \mathcal{N}\left(-\frac{1}{2}s_j^2, s_j^2\right),$$

so that

$$\mathbb{E}[r_j(\tau)^2] = \mathbb{E}[e^{Y_j}] = \exp\left(-\frac{1}{2}s_j^2 + \frac{1}{2}s_j^2\right) = 1.$$

This ensures the energy-preserving condition  $\mathbb{E}[r_j(\tau)^2] = 1$  (Assumption 5), while the parameter  $s_j^2 > 0$  controls the strength of teleportation-induced variability on coordinate  $j$ . Practically, the defender can aim to implement such marginals by sampling  $\tau$  so that the induced ratios  $r_j(\tau)^2$  are approximately log-normal; we do not model the exact mapping from channel-wise  $\tau^{[c]}$  to ratio marginals. We emphasize that this is an *effective parametric family* for  $r_j^2$ , chosen for analytical clarity; our rigorous inequalities rely only on Assumption 5, while log-normality is used to express the dependence on a small number of variance parameters.

Under this model, the per-coordinate quantities  $\psi_{i,j}$  and  $\Delta\psi_{i,j}$  admit explicit expressions.

**Corollary 2** (Log-normal teleportation and analytic MSE bound improvement). *Under the log-normal CoB marginal model above, for each mixture component  $i$  and coordinate  $j$ ,*

$$\psi_{i,j}(s_j^2) = \mathbb{E}_{Y_j \sim \mathcal{N}(-\frac{1}{2}s_j^2, s_j^2)} [\log(1 + \alpha_{i,j}e^{Y_j})], \quad (40)$$

and

$$\Delta\psi_{i,j}(s_j^2) = \log(1 + \alpha_{i,j}) - \mathbb{E}_{Y_j \sim \mathcal{N}(-\frac{1}{2}s_j^2, s_j^2)} [\log(1 + \alpha_{i,j}e^{Y_j})]. \quad (41)$$

Let  $\xi_0$  and  $\xi_{\text{tele}}$  denote the analytic lower bounds on the minimal reconstruction MSE for the non-teleported and teleported channels, respectively, as defined in equation 36–equation 37. Then

$$\frac{\xi_{\text{tele}}(s^2)}{\xi_0} = \exp\left(\frac{1}{d} \sum_{i=1}^K \pi_i \sum_{j=1}^m [\log(1 + \alpha_{i,j}) - \psi_{i,j}(s_j^2)]\right), \quad (42)$$

where  $s^2 = (s_1^2, \dots, s_m^2)$  collects the log-variance parameters across coordinates.

*Proof.* The identities equation 40–equation 41 are obtained by substituting  $r_j^2 = e^{Y_j}$  with  $Y_j \sim \mathcal{N}(-\frac{1}{2}s_j^2, s_j^2)$  into the definition equation 29 of  $\psi_{i,j}$  and the definition equation 33 of  $\Delta\psi_{i,j}$ . The ratio equation 42 then follows immediately by plugging  $\Delta\psi_{i,j}(s_j^2)$  into equation 39, which relates the analytic MSE lower bounds  $\xi_{\text{tele}}$  and  $\xi_0$  to the  $\Delta\psi_{i,j}$ .  $\square$

**Remark 3** (Local small-variance expansion (heuristic)). To gain intuition about the dependence on teleportation strength, it is useful to consider the regime  $s_j^2 \ll 1$ , where the log-normal marginals are close to the degenerate case  $r_j^2 \equiv 1$ . This section provides a local Taylor expansion for intuition; it is *not* used in our rigorous inequalities, which already follow from Assumption 5.

For  $t_j := r_j^2 = e^{Y_j}$  with  $Y_j \sim \mathcal{N}(-\frac{1}{2}s_j^2, s_j^2)$  we have

$$\mathbb{E}[t_j] = 1, \quad \text{Var}(t_j) = \mathbb{E}[t_j^2] - 1 = \exp(s_j^2) - 1.$$

Thus  $\text{Var}(t_j) = s_j^2 + O(s_j^4)$  as  $s_j^2 \rightarrow 0$ . Writing  $t_j = 1 + \delta_j$ , we have  $\mathbb{E}[\delta_j] = 0$  and  $\text{Var}(\delta_j) = \text{Var}(t_j)$ .

Since log-normal marginals have finite moments of all orders, a second-order Taylor expansion of  $\phi_\alpha(t) := \log(1 + \alpha t)$  around  $t = 1$  yields

$$\phi_\alpha(1 + \delta) = \log(1 + \alpha) + \frac{\alpha}{1 + \alpha} \delta - \frac{\alpha^2}{2(1 + \alpha)^2} \delta^2 + R_\alpha(\delta),$$

with  $|R_\alpha(\delta)| \leq C_\alpha |\delta|^3$  for some constant  $C_\alpha$  depending on  $\alpha$ . Taking expectations with  $\mathbb{E}[\delta] = 0$  and  $\mathbb{E}[\delta^2] = \text{Var}(t_j)$  gives

$$\mathbb{E}[\phi_\alpha(1 + \delta)] = \log(1 + \alpha) - \frac{\alpha^2}{2(1 + \alpha)^2} \text{Var}(t_j) + O(\mathbb{E}[|\delta|^3]).$$

Applying this with  $\alpha = \alpha_{i,j}$  and  $t_j = r_j^2$ , and recalling that  $\psi_{i,j} = \mathbb{E}[\log(1 + \alpha_{i,j}r_j^2)]$ , we obtain the local approximation

$$\Delta\psi_{i,j}(s_j^2) = \log(1 + \alpha_{i,j}) - \psi_{i,j}(s_j^2) \approx \frac{\alpha_{i,j}^2}{2(1 + \alpha_{i,j})^2} \text{Var}(t_j),$$

with an error term controlled by  $\mathbb{E}[|\delta_j|^3]$ . For the log-normal model,  $\text{Var}(t_j) = \exp(s_j^2) - 1$ , so we arrive at the heuristic expression

$$\Delta\psi_{i,j}(s_j^2) \approx \frac{\alpha_{i,j}^2}{2(1 + \alpha_{i,j})^2} (\exp(s_j^2) - 1), \quad s_j^2 \ll 1.$$

Substituting this into equation 42 yields the corresponding small-variance approximation for the logarithm of the analytic MSE bound ratio:

$$\log \frac{\xi_{\text{tele}}(s^2)}{\xi_0} \approx \frac{1}{2d} \sum_{i=1}^K \pi_i \sum_{j=1}^m \frac{\alpha_{i,j}^2}{(1 + \alpha_{i,j})^2} (\exp(s_j^2) - 1), \quad s_j^2 \ll 1.$$

This approach highlight that, in the small-variance regime, the teleportation-induced improvement in the analytic reconstruction MSE lower bound grows approximately linearly in  $s_j^2$  (via  $\exp(s_j^2) - 1$ ), with a slope governed by the per-coordinate signal-to-noise ratios  $\alpha_{i,j}$  and the mixture weights  $\pi_i$ .

## P ABLATION: SENSITIVITY OF TELEPORTATION HYPERPARAMETERS

Teleportation introduces a small set of additional hyperparameters that control how strongly we move along symmetry directions. In this section we study the sensitivity of WARP to two core choices: (i) the target retain-variance fraction used to choose the per-layer rank  $k$  in the SVD projector (Section 3.2), and (ii) the size of the retain minibatch  $B_r$  used to estimate the retain subspace. Both directly govern the geometry of the retain null space and the amount of stochasticity in the teleportation step, and were explicitly highlighted as potential sources of instability.

**Setup.** We perform a controlled sweep on CIFAR-10 with ResNet-18 and NGP+WARP under the U-LIRA black-box auditor (Section 4.2). For the SVD projector, we vary the target retain-variance level from 95% to 99.9%, which induces different per-layer ranks  $k_\ell$  such that the top singular vectors of  $R_\ell(D_r)$  capture the chosen fraction of retain energy. For the retain minibatch, we vary the teleportation batch size  $|B_r| \in \{256, 512, 1024, 2048, 4096\}$  while keeping the forget minibatch and unlearning hyperparameters fixed. For each configuration we run the full unlearning pipeline and record test accuracy as well as privacy measured by  $(1 - \text{AUC})$  of U-LIRA (higher is better).

**Results and discussion.** Figure 12 shows that teleportation is *remarkably insensitive* to both hyperparameters in the regime we consider.

**Retain-variance target.** Increasing the target retain-variance from 95% to 99.9% changes privacy  $(1 - \text{AUC})$  by less than 0.015 in absolute terms, while test accuracy varies in a narrow band of  $\approx 0.79$ – $0.80$ . Privacy slightly improves as we move from 95% to around 99.3%, after which the curve flattens: very high targets effectively make the retain projector full-rank, leaving less room for teleportation to move in symmetry directions and yielding diminishing returns. The configuration used in the main experiments (target retain-variance  $\approx 99.3\%$ ) lies near this plateau, indicating that our chosen rank provides a good privacy–utility compromise.

**Retain minibatch size  $|B_r|$ .** Varying  $|B_r|$  over an order of magnitude has only a minor effect: privacy  $(1 - \text{AUC})$  shifts by at most  $\sim 0.01$ , and test accuracy remains within  $\pm 0.2\%$  points of 0.796. Even relatively small batches ( $|B_r| = 256$ ) already provide a sufficiently representative retain subspace for teleportation, and larger batches only yield a slight, saturating gain in privacy. This suggests that the random retain minibatch need not tightly approximate the full retain set to obtain a stable projector and effective defense; in practice, a modest  $|B_r|$  balances computational cost with stable subspace estimation.

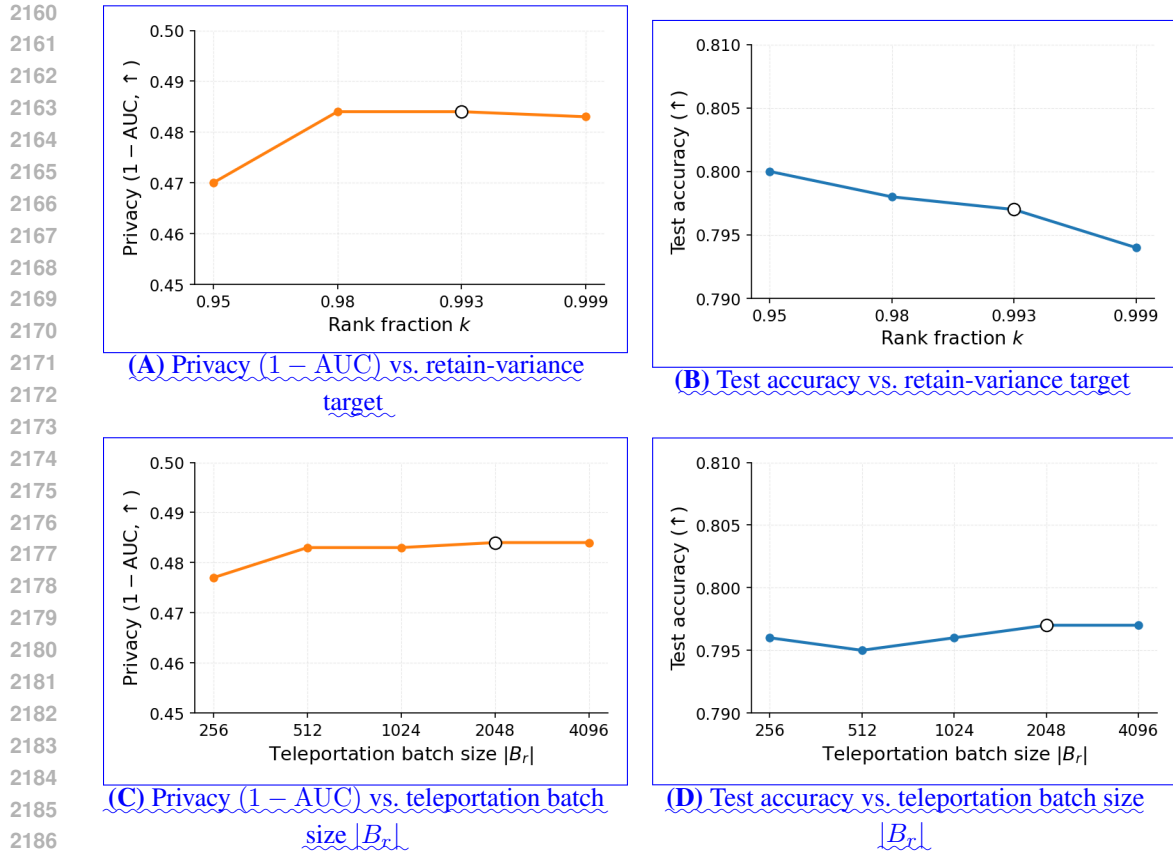

Figure 12: **Sensitivity of teleportation hyperparameters.** Plots (A,B) vary the target retain-variance level used to set the per-layer rank  $k_\ell$ ; plots (C,D) vary the retain minibatch size  $|B_r|$  used to estimate the retain subspace. Privacy is measured as  $1 - \text{AUC}$  of U-LiRA (higher is better). Markers highlight the configuration used in our main experiments (95.3% retain variance and  $|B_r| = 2048$ ).

Overall, these ablations show that WARP’s performance does not hinge on fragile hyperparameter choices: both privacy and utility are stable across wide ranges of the SVD rank and retain minibatch size. Moreover, the small spread in test accuracy ( $< 0.6\%$  across all settings) empirically confirms that teleportation remains approximately loss-preserving on the retain set, providing an implicit bound on worst-case retain-loss drift in our experiments.
